# Supplementary material for: Mapping mutational effects along the evolutionary landscape of HIV envelope
Source: eLife journal article supplement (doi:10.7554/elife.34420), 2018-03-28

# A) Closed pre-fusion conformation

Trimer apex

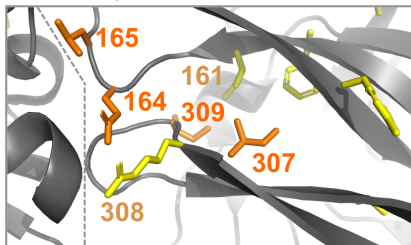

## Key:

- **Blue:** sites in the hydrophobic network
- **Purple:** the one site that has shifted and is also in the hydrophobic network
- **Red:** sites that have shifted
- **Orange:** sites that have both shifted and substituted
- **Yellow:** sites that have substituted

# B) Closed pre-fusion conformation

Sites near the hydrophobic network

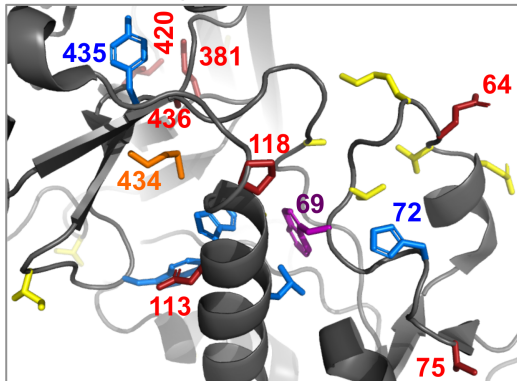

# Open CD4-bound conformation

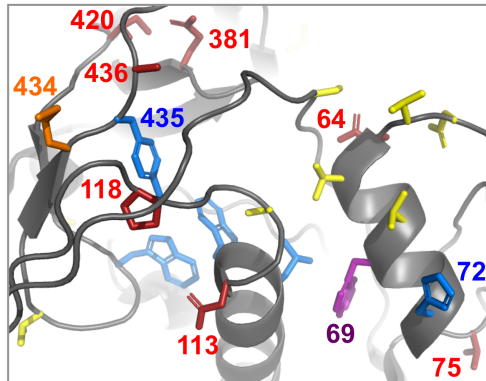

Supplement: supp [file elife_poa_e34420_Figure_7_figure_supplement_2.pdf › elife_poa_e34420_Figure_7_figure_supplement_2.pdf]
