# Supplementary material for: Mapping mutational effects along the evolutionary landscape of HIV envelope
Source: eLife journal article supplement (doi:10.7554/elife.34420), 2018-03-28
Supplement: supp [file rsa_vs_shifts.pdf › analysis_code/results/prefsdist/rsa_vs_shifts.pdf]

relative solvent accessibility

closed pre-fusion (5FYL)

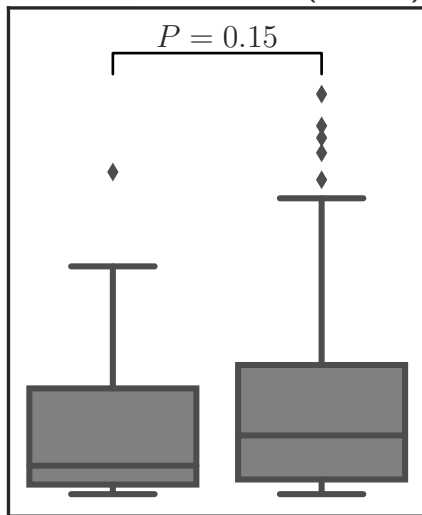

shifted  
(28 sites)  
not shifted  
(549 sites)  
significantly shifted?

CD4-bound state (5VN3)

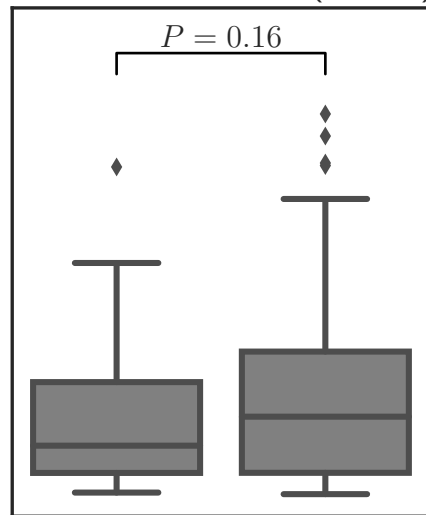

shifted  
(27 sites)  
not shifted  
(493 sites)  
significantly shifted?
