# Supplementary figures and images for: Mapping mutational effects along the evolutionary landscape of HIV envelope
Source: eLife journal article supplement (doi:10.7554/elife.34420), 2018-03-28

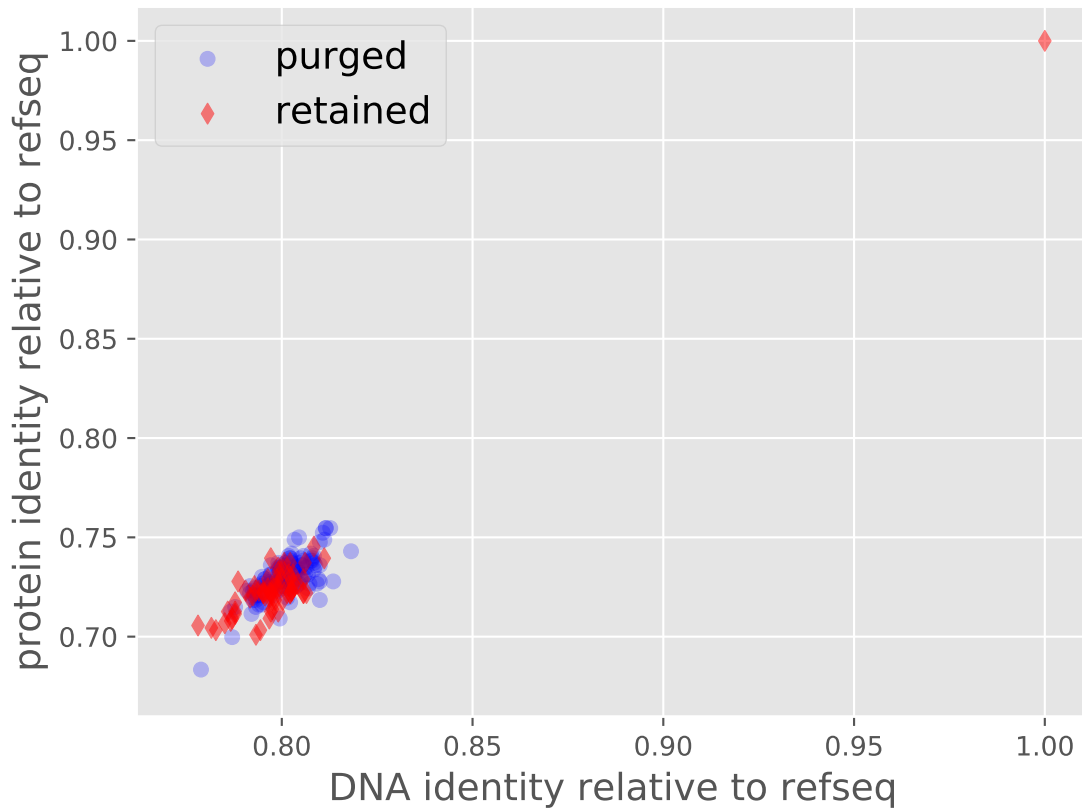

Supplement: supp [file cladeA_alignment.pdf › analysis_code/results/alignments/cladeA_alignment.pdf]

# clade A protein identity at alignable sites

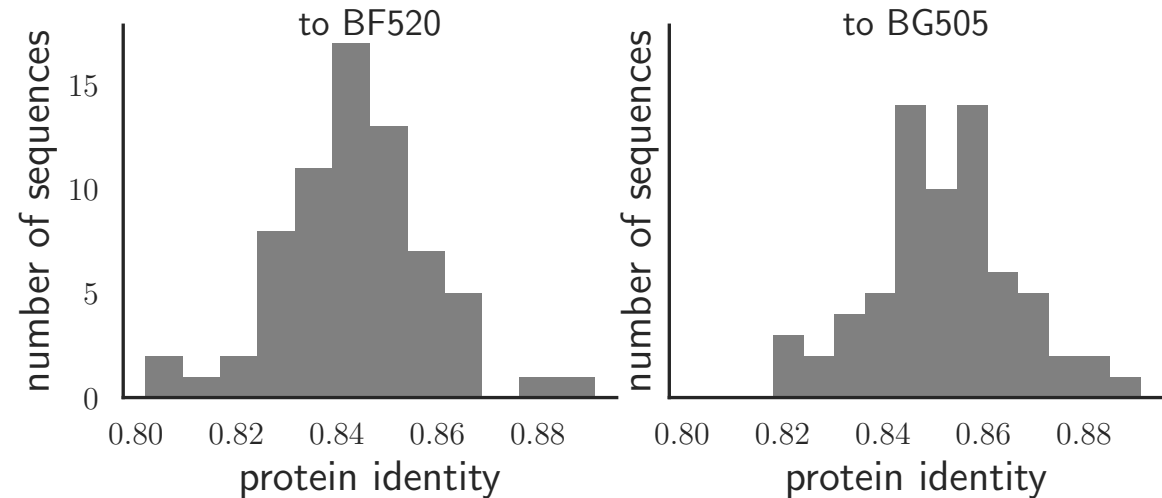

Supplement: supp [file masked_alignment_identity.pdf › analysis_code/results/alignments/masked_alignment_identity.pdf]

number of barcodes

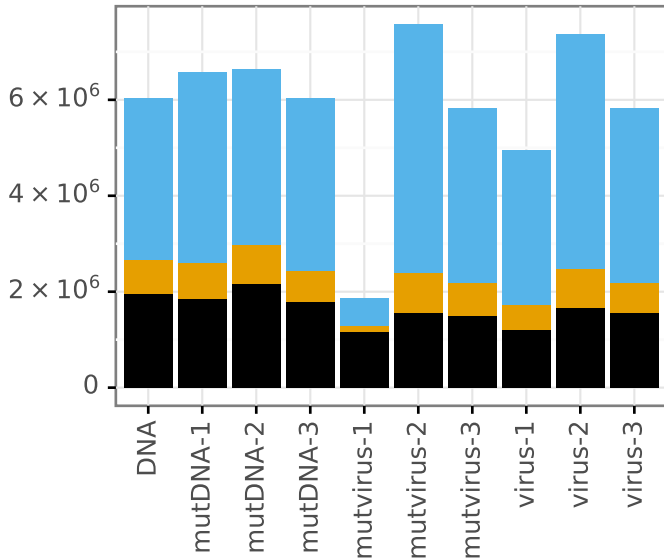

barcode fate

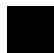

aligned

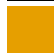

not alignable

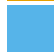

too few reads

Supplement: supp [file summary_bcstats.pdf › analysis_code/results/codoncounts/BF520/summary_bcstats.pdf]

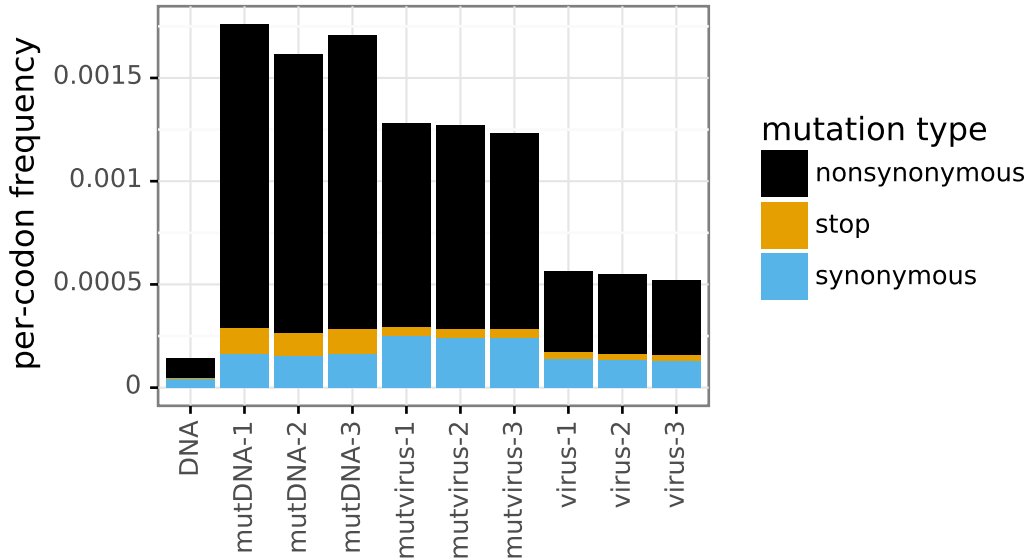

Supplement: supp [file summary_codonmuttypes.pdf › analysis_code/results/codoncounts/BF520/summary_codonmuttypes.pdf]

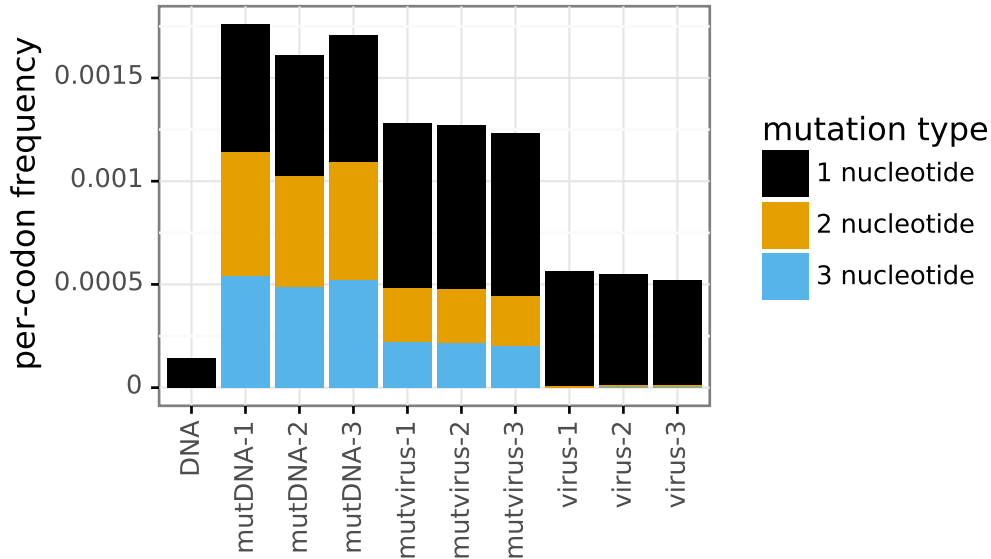

Supplement: supp [file summary_codonntchanges.pdf › analysis_code/results/codoncounts/BF520/summary_codonntchanges.pdf]

— amino acids — codons

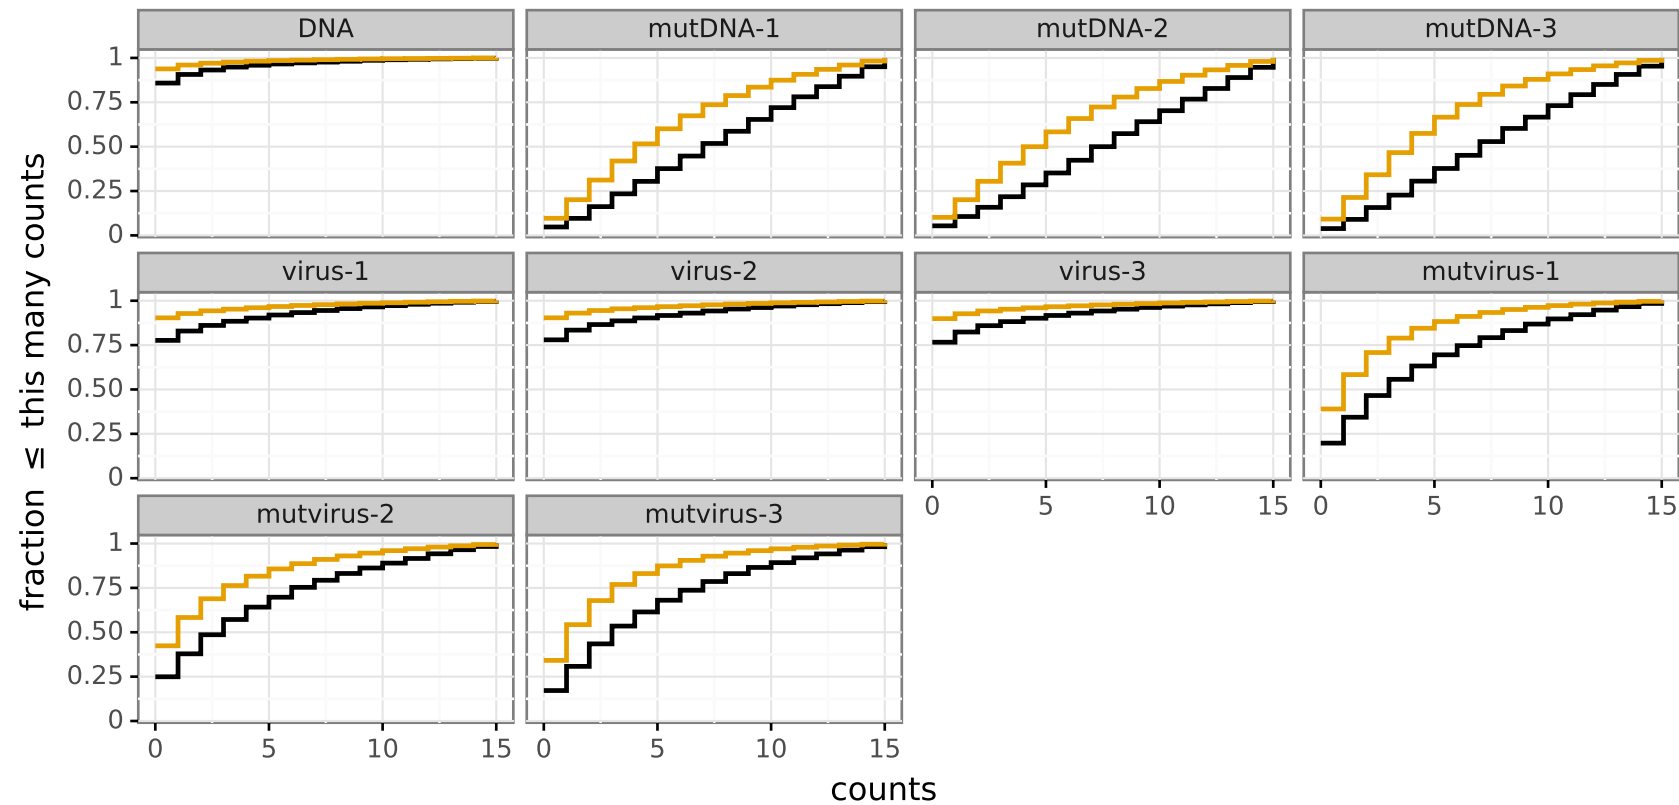

Supplement: supp [file summary_cumulmutcounts.pdf › analysis_code/results/codoncounts/BF520/summary_cumulmutcounts.pdf]

number of counts

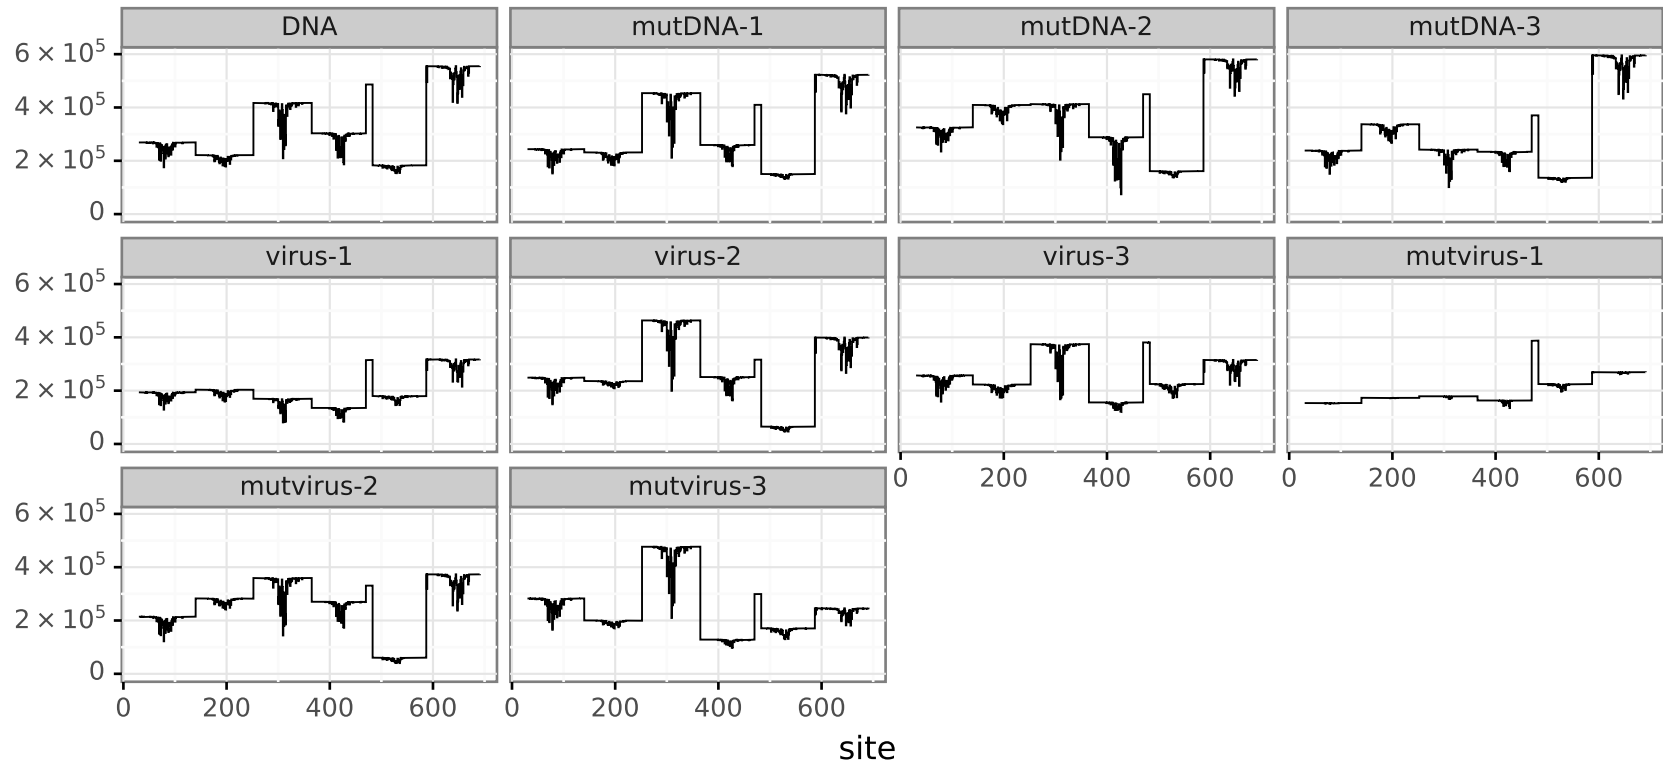

Supplement: supp [file summary_depth.pdf › analysis_code/results/codoncounts/BF520/summary_depth.pdf]

mutation frequency

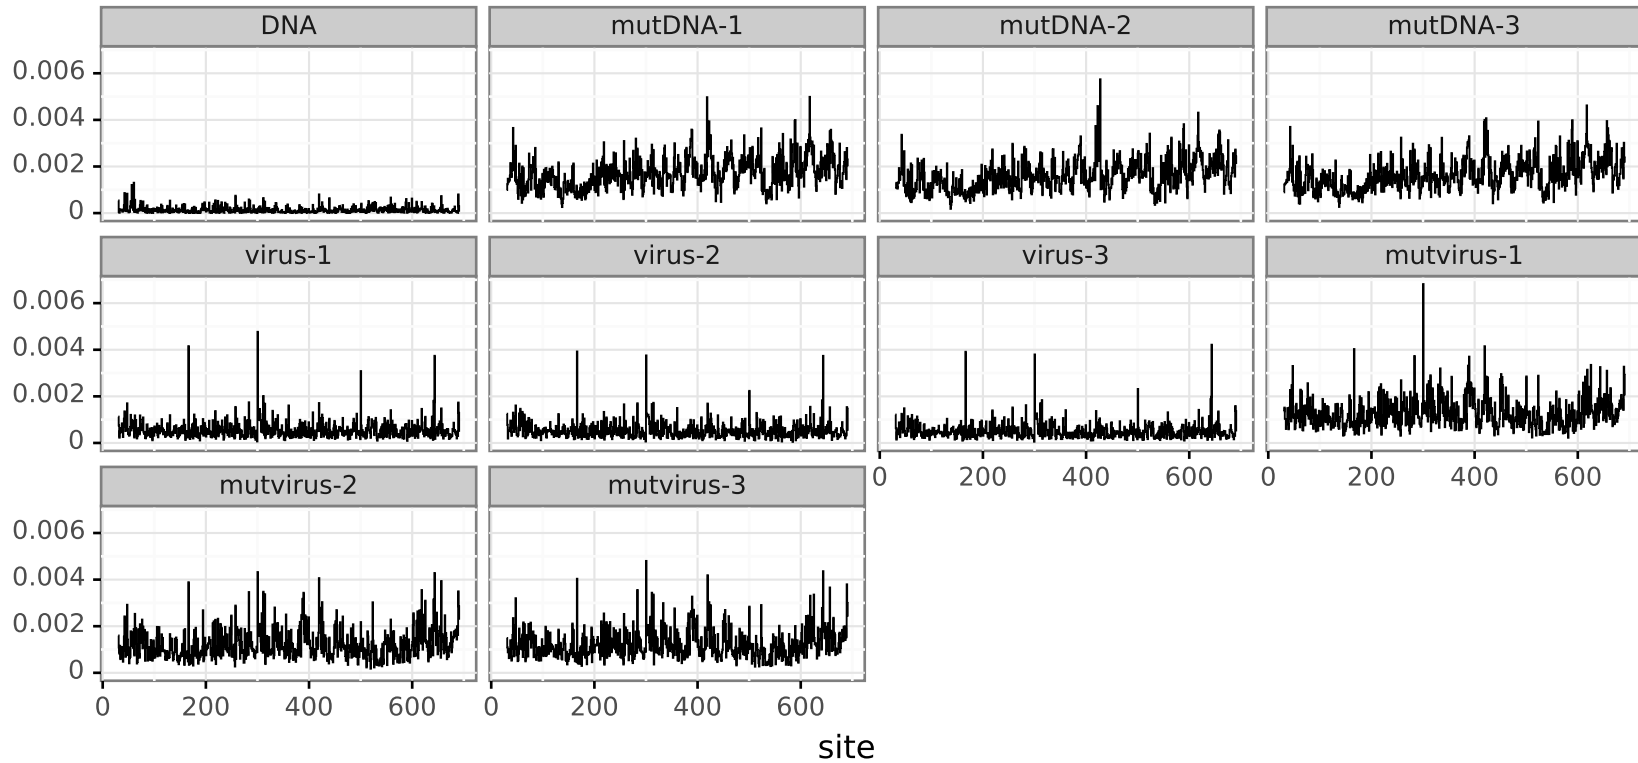

Supplement: supp [file summary_mutfreq.pdf › analysis_code/results/codoncounts/BF520/summary_mutfreq.pdf]

number of barcodes

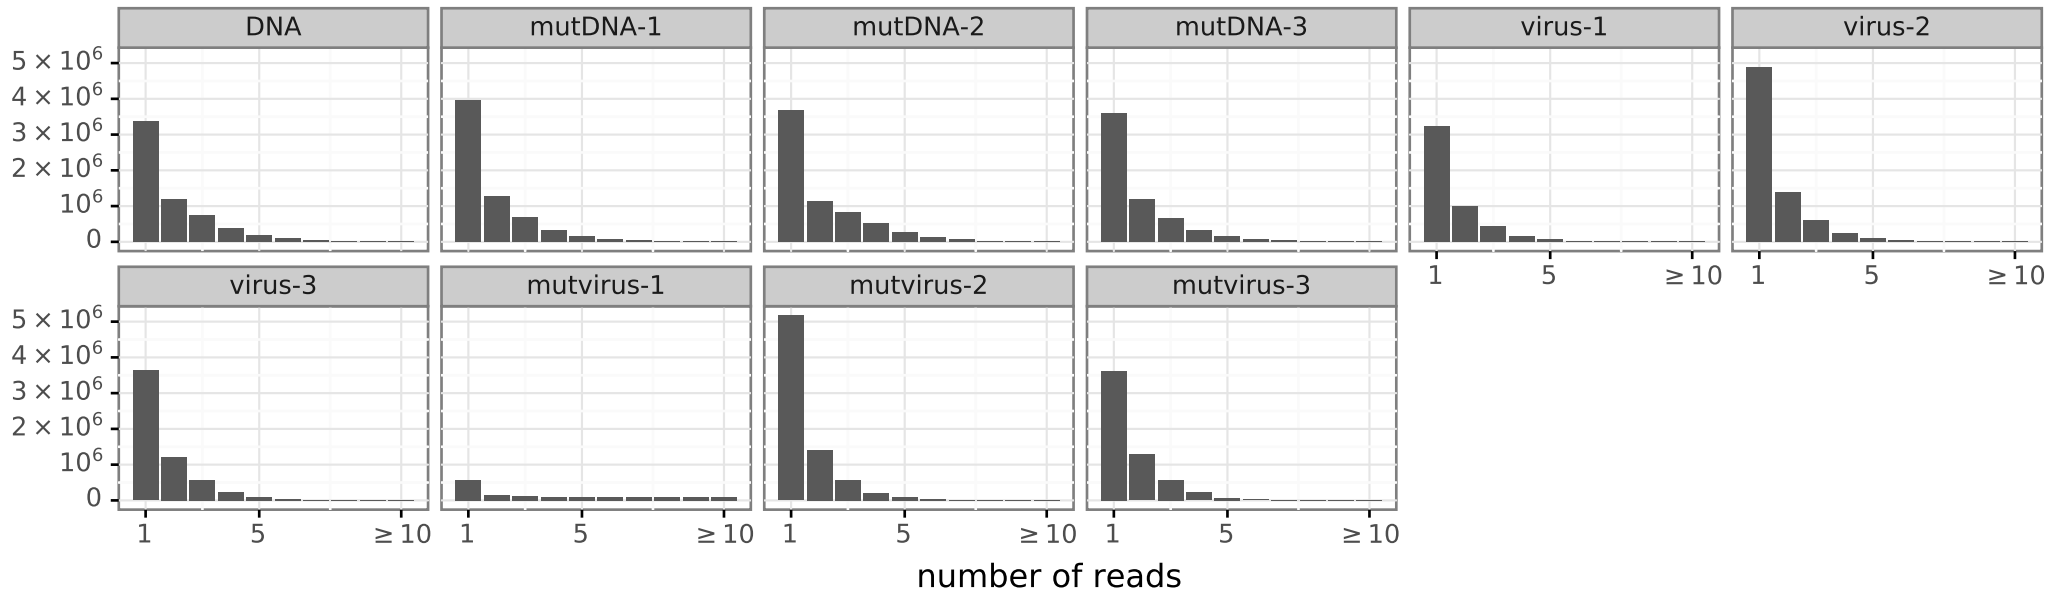

Supplement: supp [file summary_readsperbc.pdf › analysis_code/results/codoncounts/BF520/summary_readsperbc.pdf]

number of reads

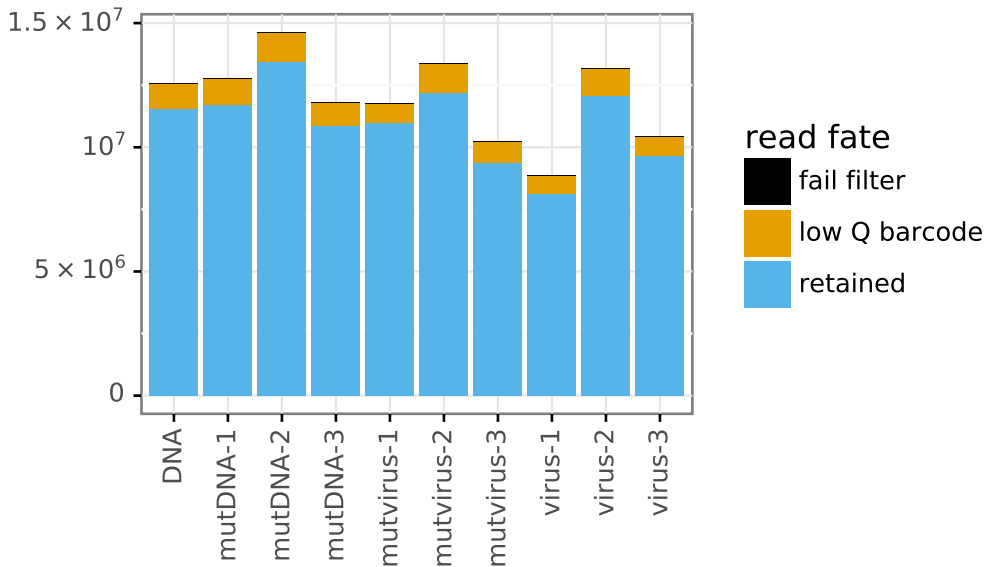

Supplement: supp [file summary_readstats.pdf › analysis_code/results/codoncounts/BF520/summary_readstats.pdf]

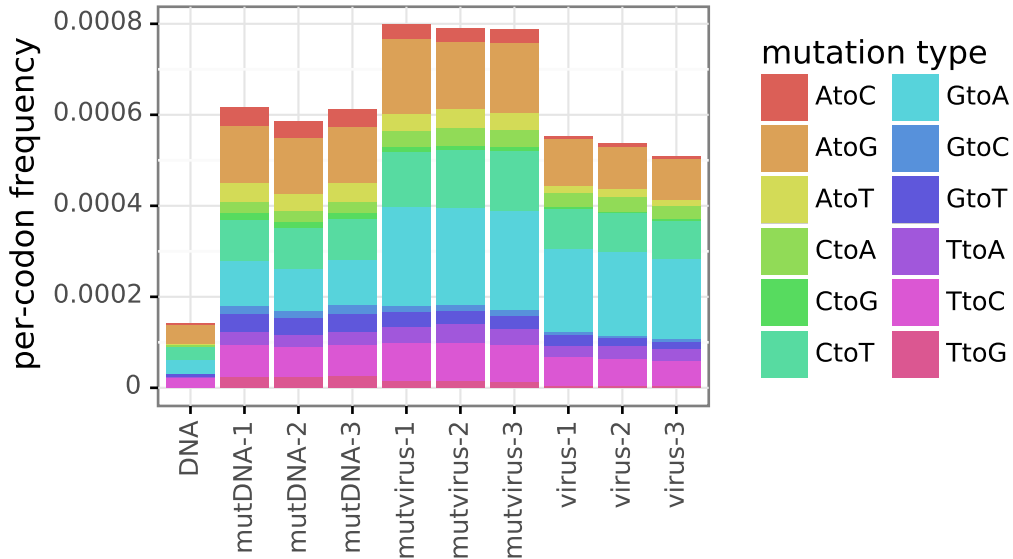

Supplement: supp [file summary_singlentchanges.pdf › analysis_code/results/codoncounts/BF520/summary_singlentchanges.pdf]

number of barcodes

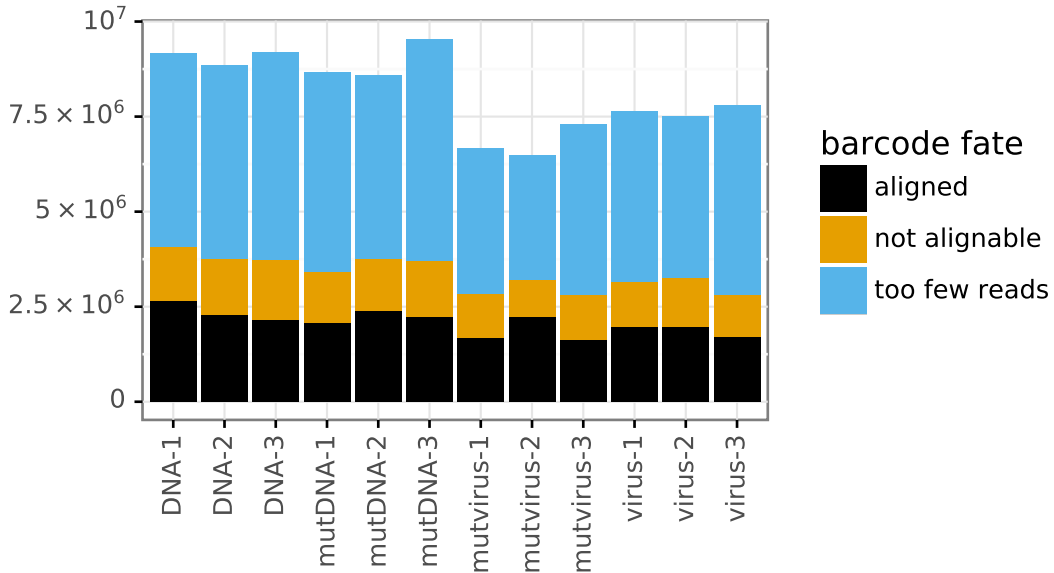

Supplement: supp [file summary_bcstats.pdf › analysis_code/results/codoncounts/BG505/summary_bcstats.pdf]

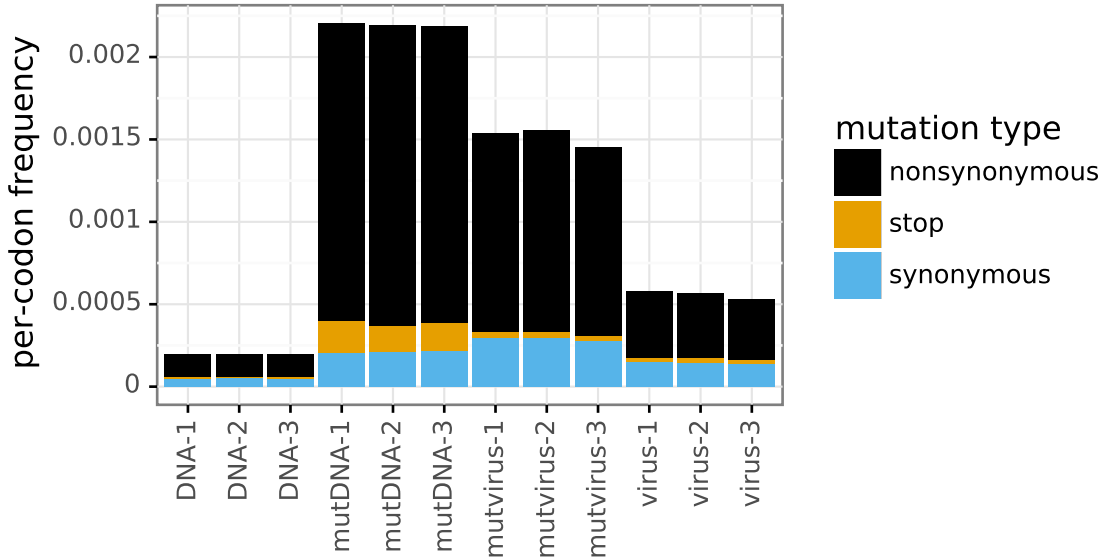

Supplement: supp [file summary_codonmuttypes.pdf › analysis_code/results/codoncounts/BG505/summary_codonmuttypes.pdf]

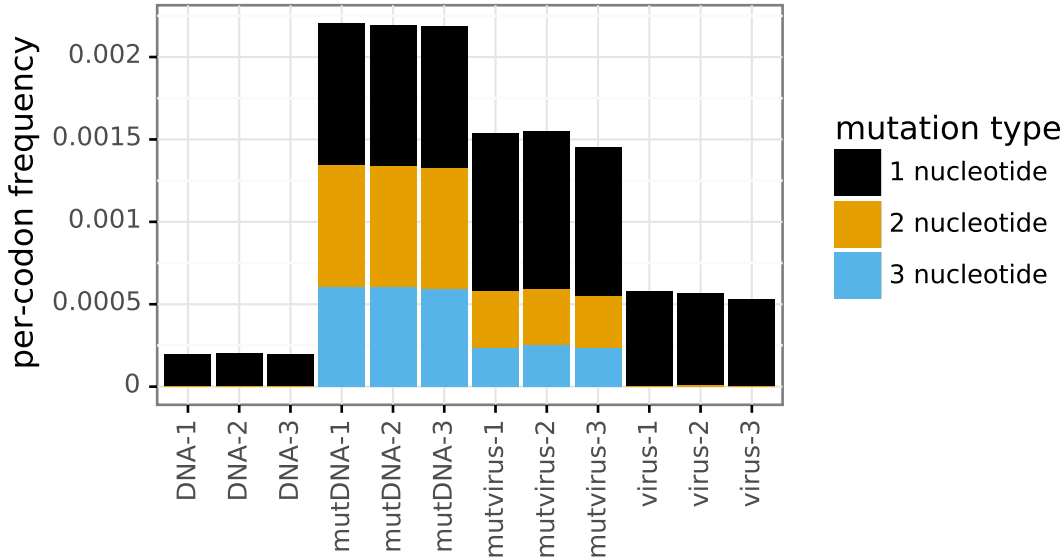

Supplement: supp [file summary_codonntchanges.pdf › analysis_code/results/codoncounts/BG505/summary_codonntchanges.pdf]

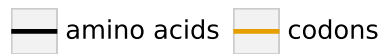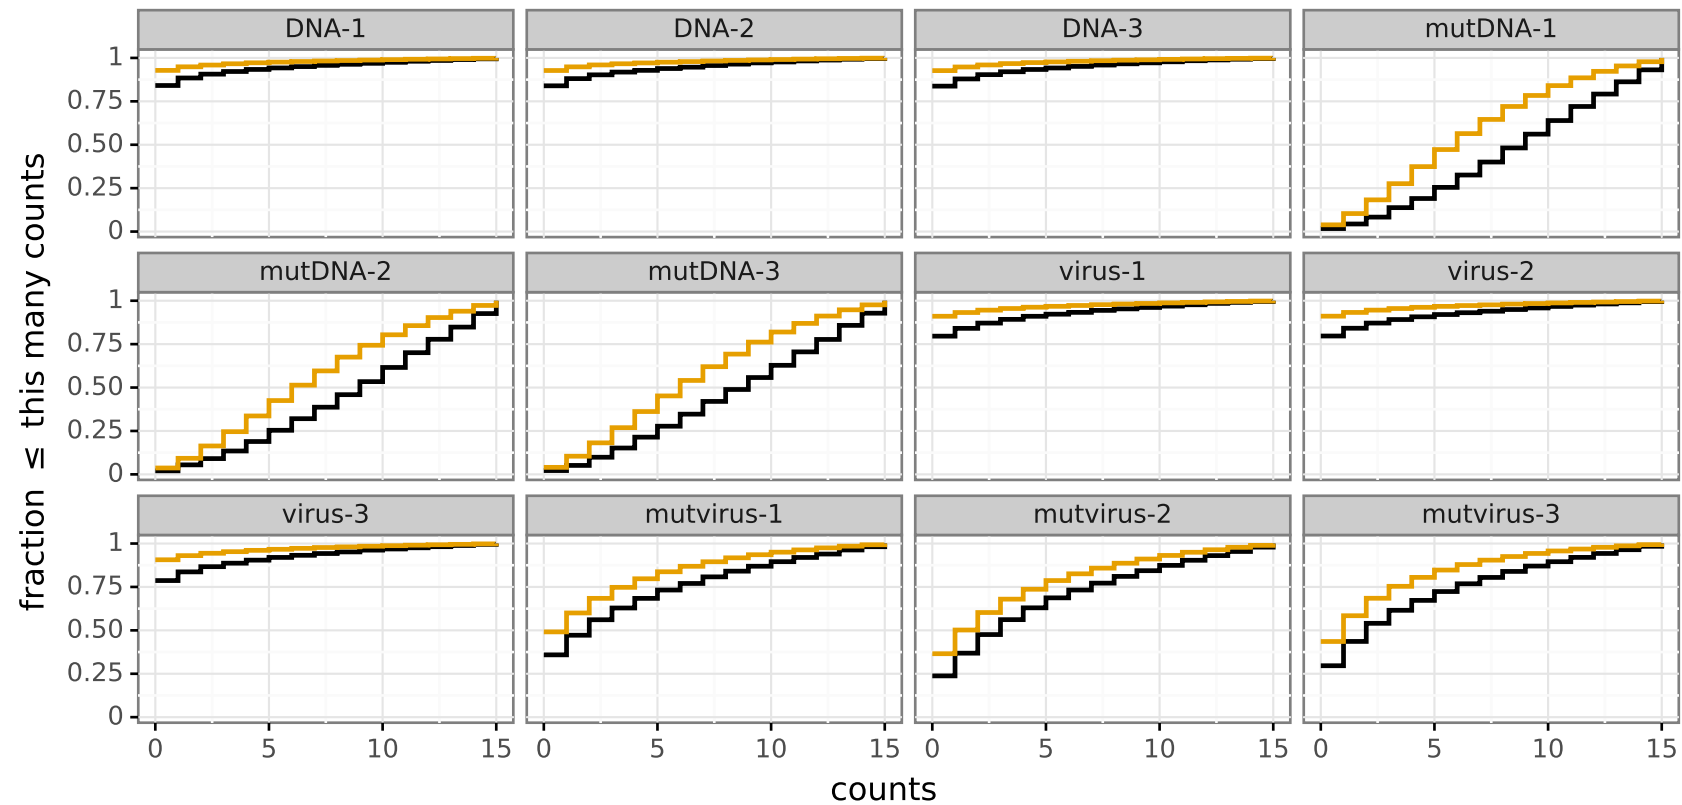

Supplement: supp [file summary_cumulmutcounts.pdf › analysis_code/results/codoncounts/BG505/summary_cumulmutcounts.pdf]

number of counts

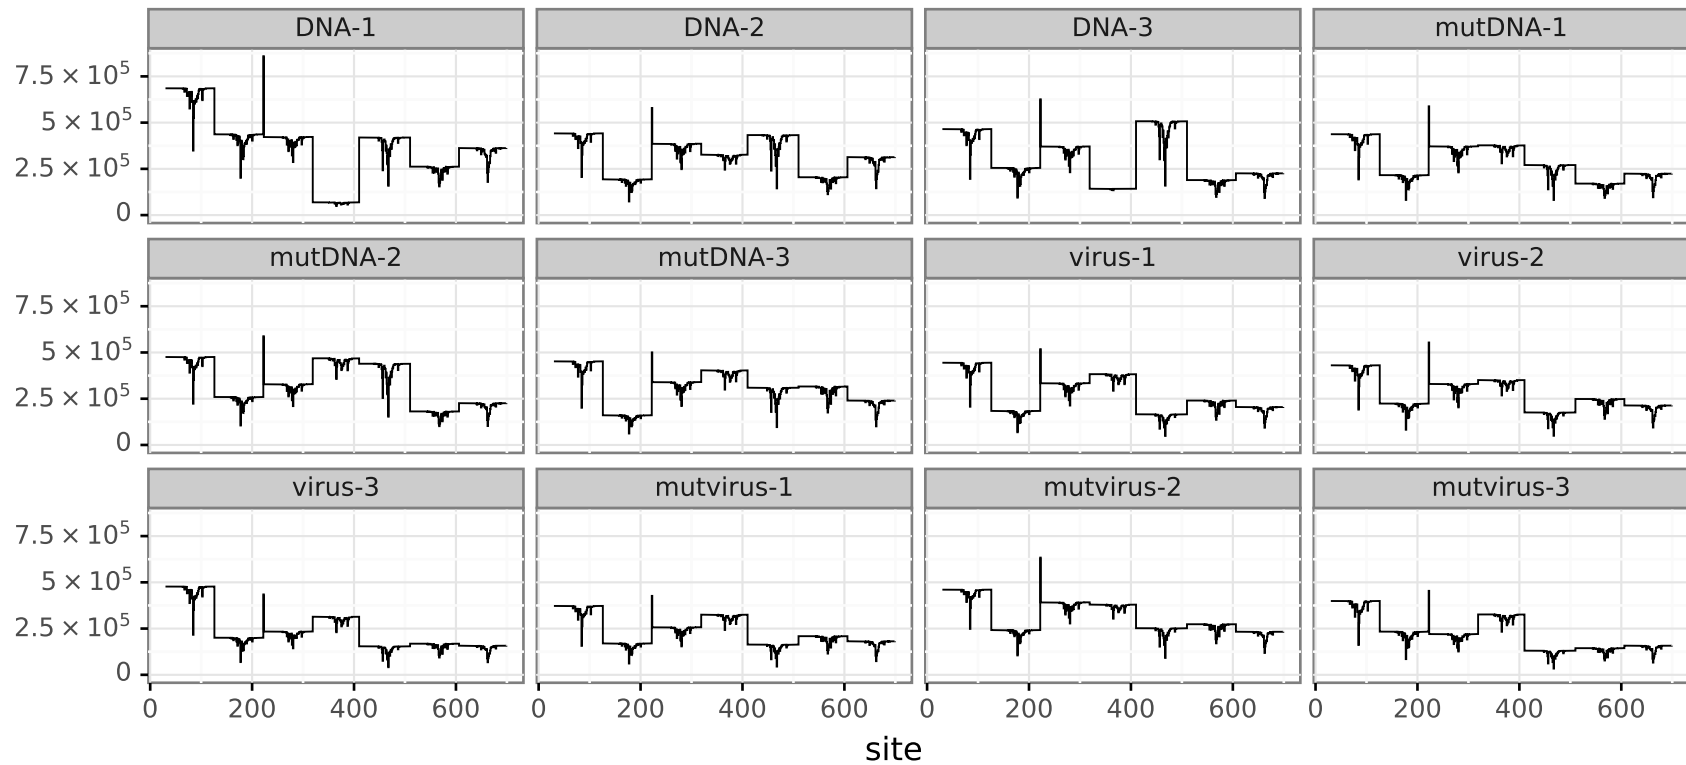

Supplement: supp [file summary_depth.pdf › analysis_code/results/codoncounts/BG505/summary_depth.pdf]

mutation frequency

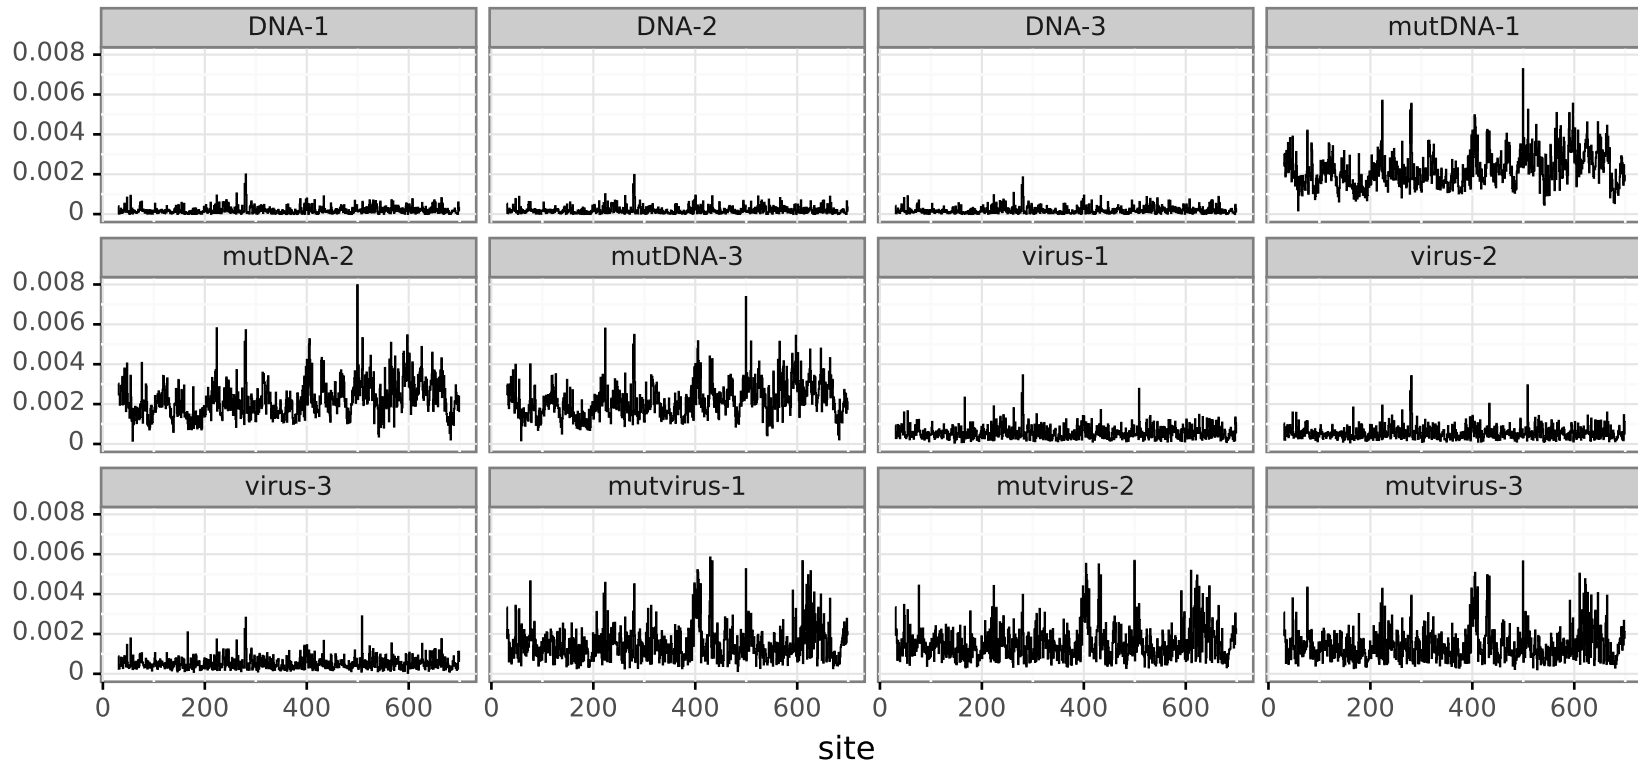

Supplement: supp [file summary_mutfreq.pdf › analysis_code/results/codoncounts/BG505/summary_mutfreq.pdf]

number of barcodes

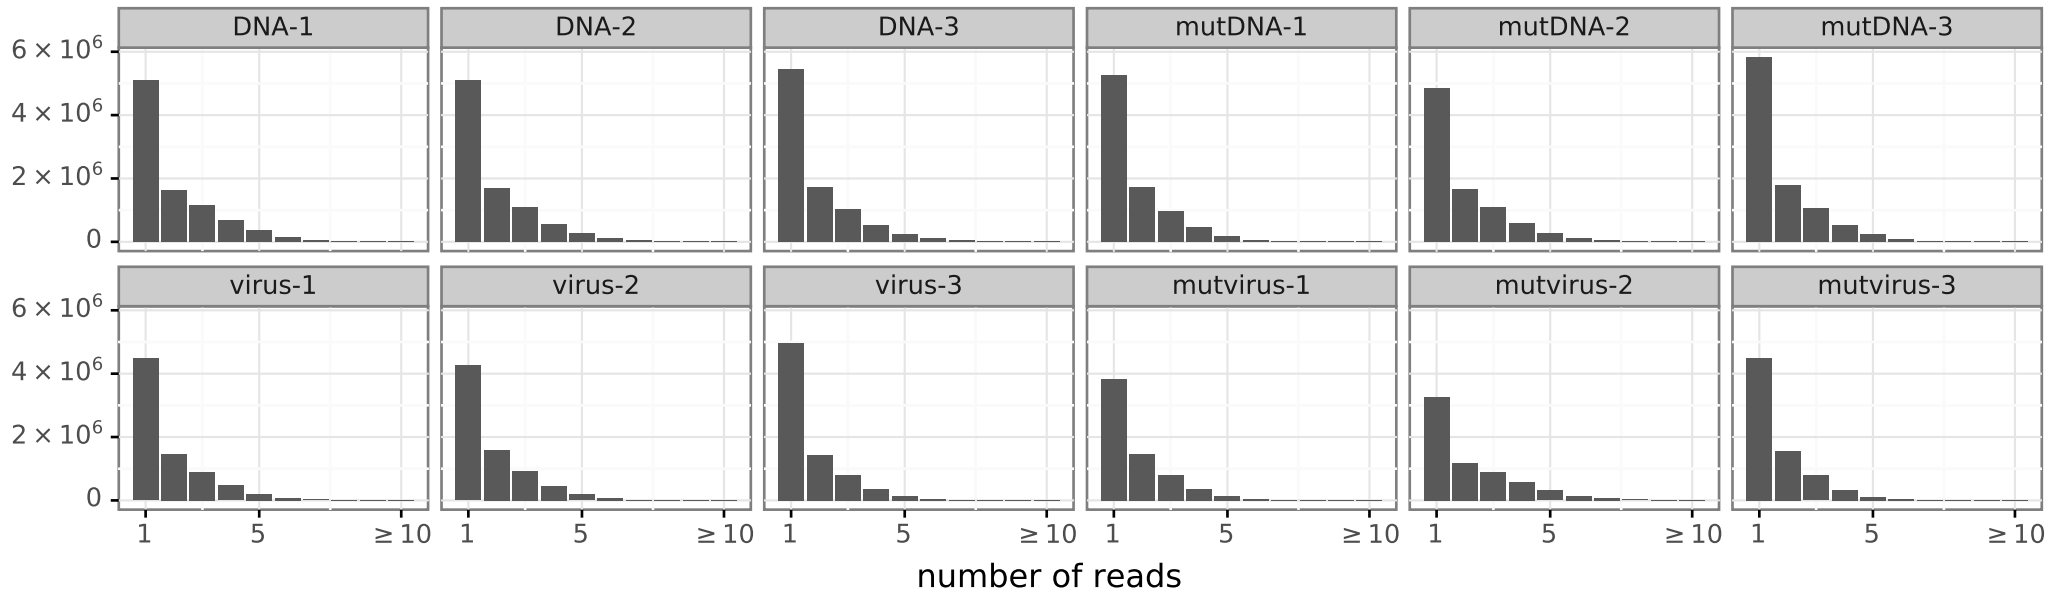

Supplement: supp [file summary_readsperbc.pdf › analysis_code/results/codoncounts/BG505/summary_readsperbc.pdf]

number of reads

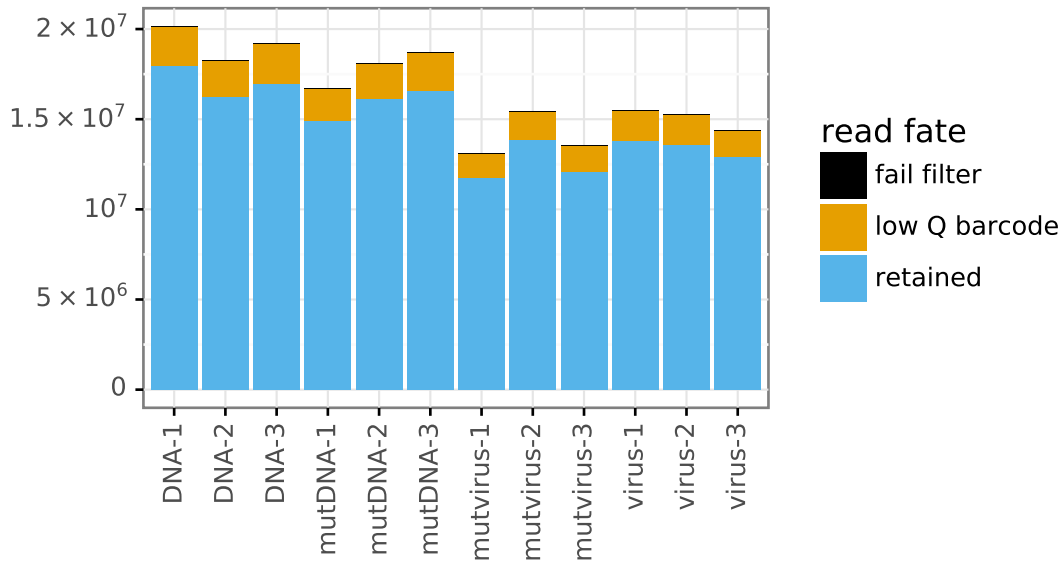

Supplement: supp [file summary_readstats.pdf › analysis_code/results/codoncounts/BG505/summary_readstats.pdf]

per-codon frequency

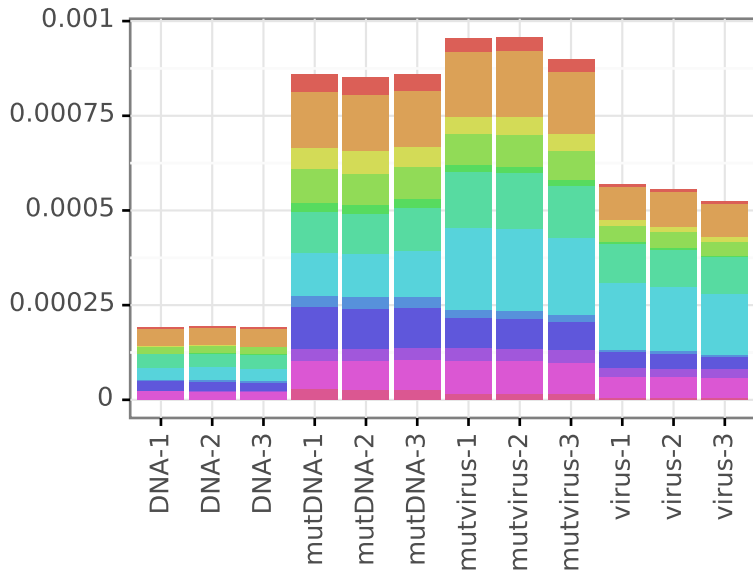

mutation type

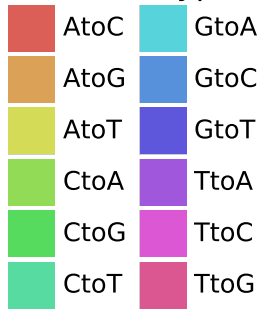

Supplement: supp [file summary_singlentchanges.pdf › analysis_code/results/codoncounts/BG505/summary_singlentchanges.pdf]

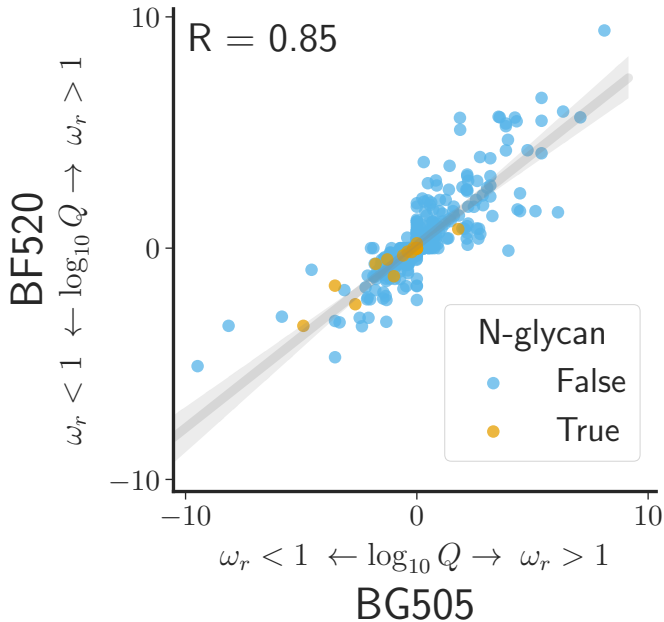

Supplement: supp [file diversifying_selection_corr.pdf › analysis_code/results/phydms_analysis/diversifying_selection_corr.pdf]

closed pre-fusion (5FYL)

CD4-bound state (5VN3)

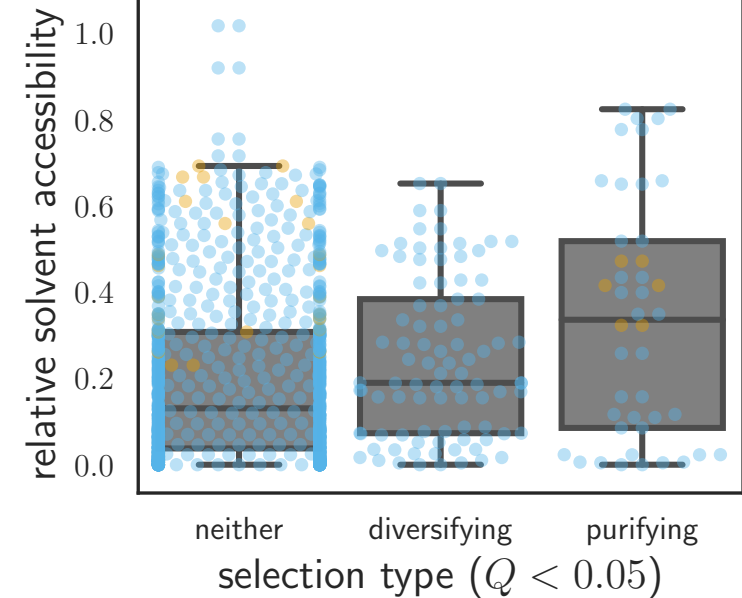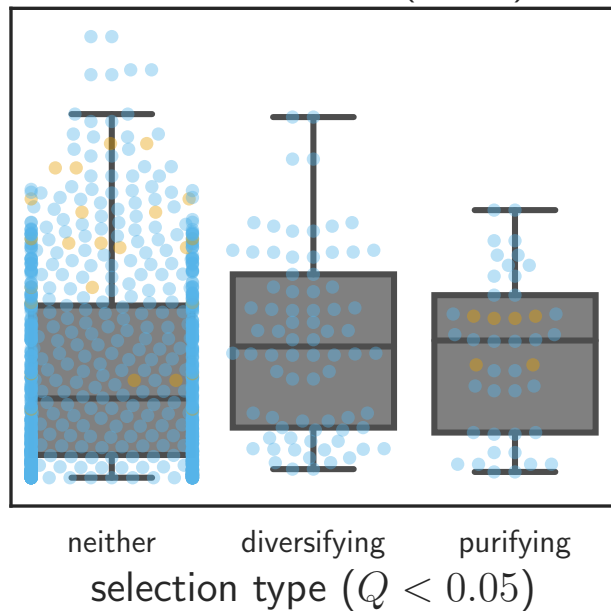

Supplement: supp [file selsites_rsa.pdf › analysis_code/results/phydms_analysis/selsites_rsa.pdf]

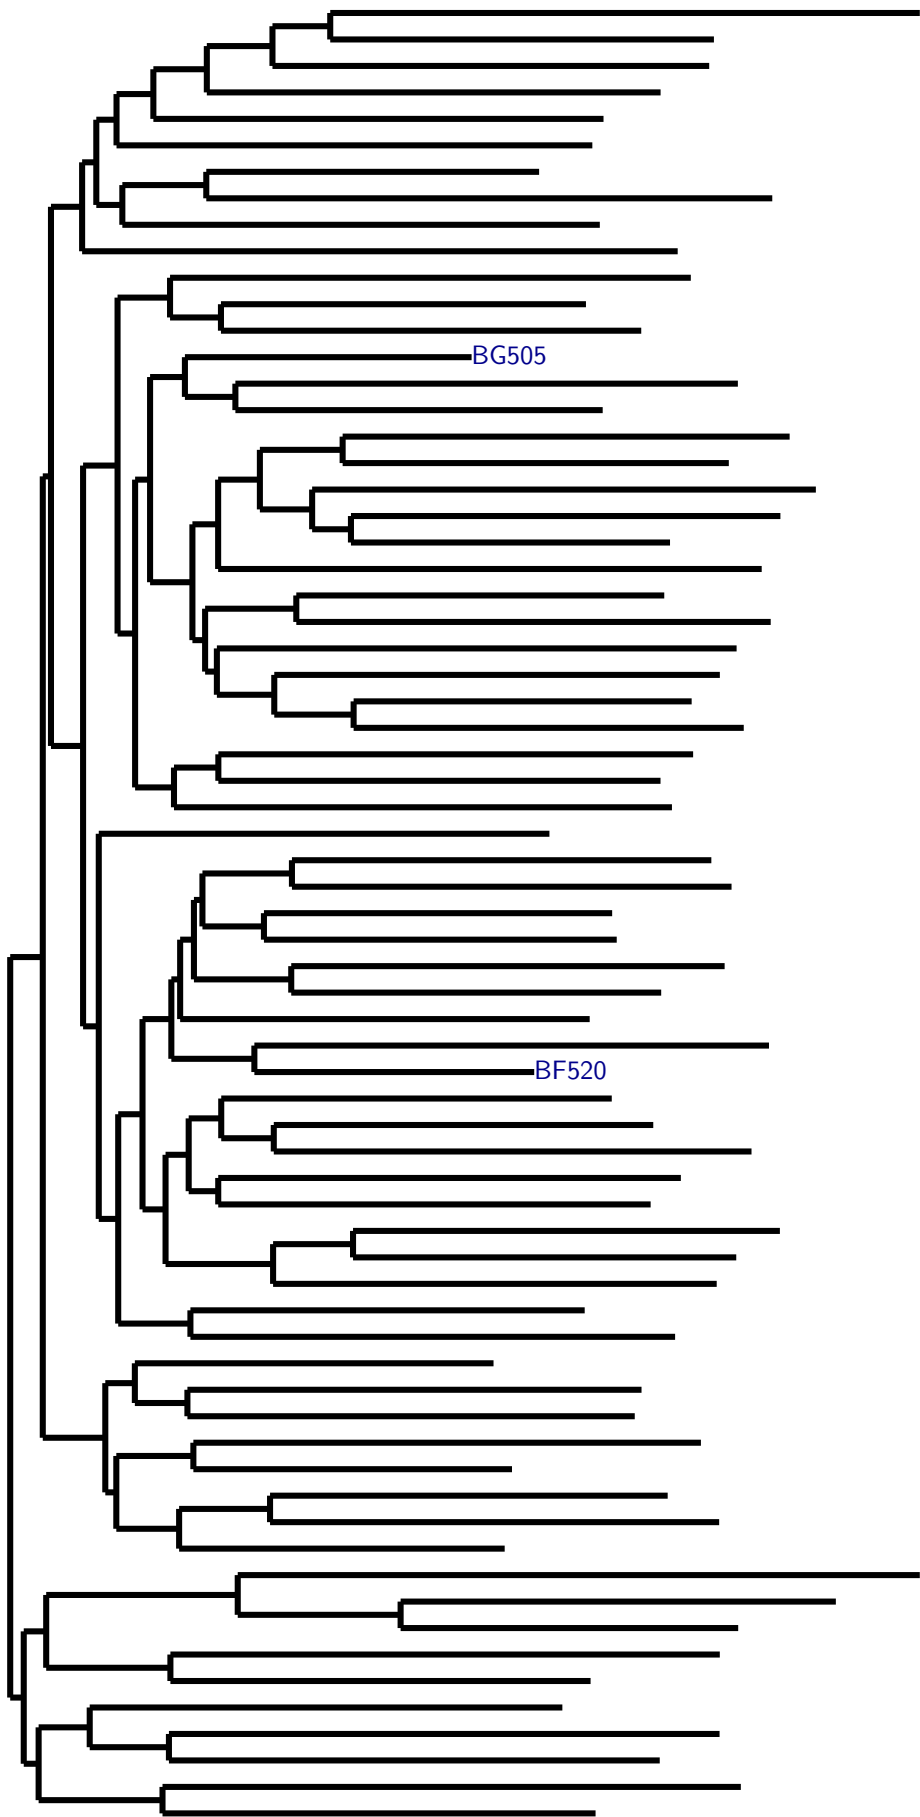

0.1 codon substitutions / site

Supplement: supp [file tree_plot.pdf › analysis_code/results/phydms_analysis/tree_plot.pdf]

$\omega_r < 1 \leftarrow -\log_{10} I \rightarrow \omega_r > 1 (\omega_r)$

region (R)

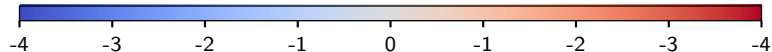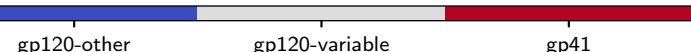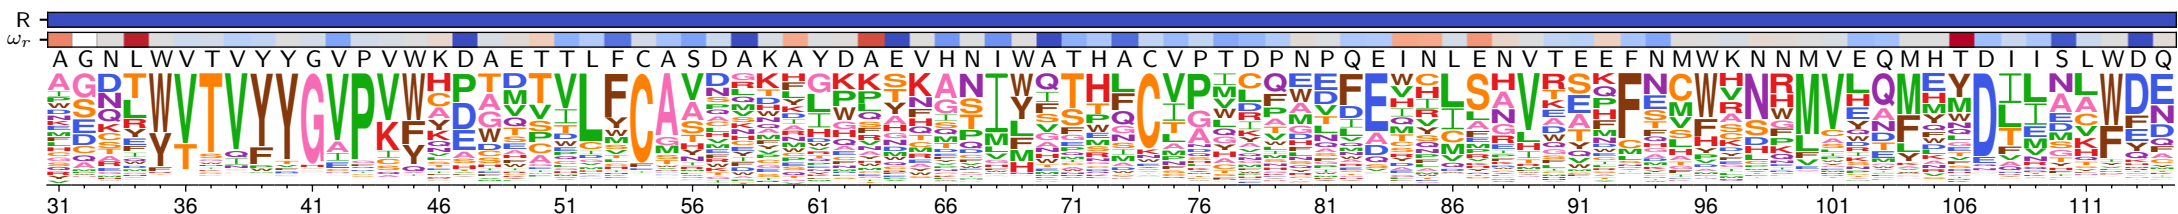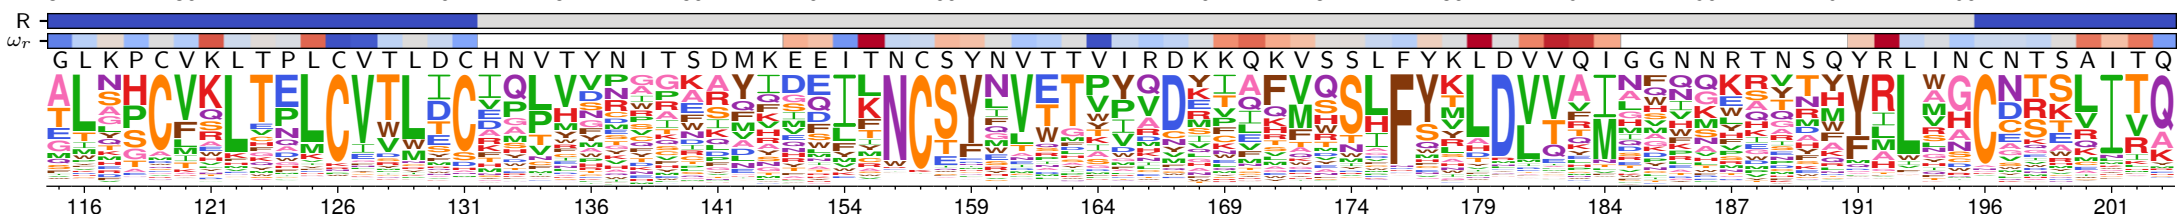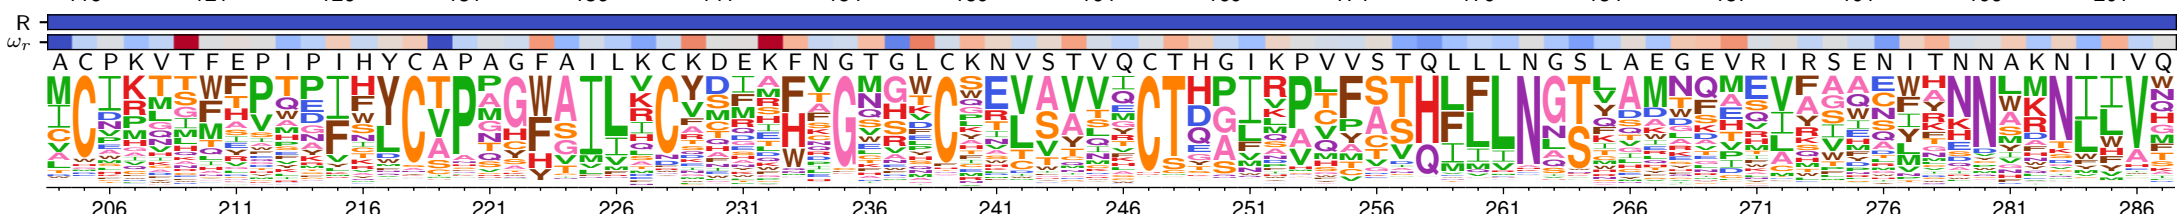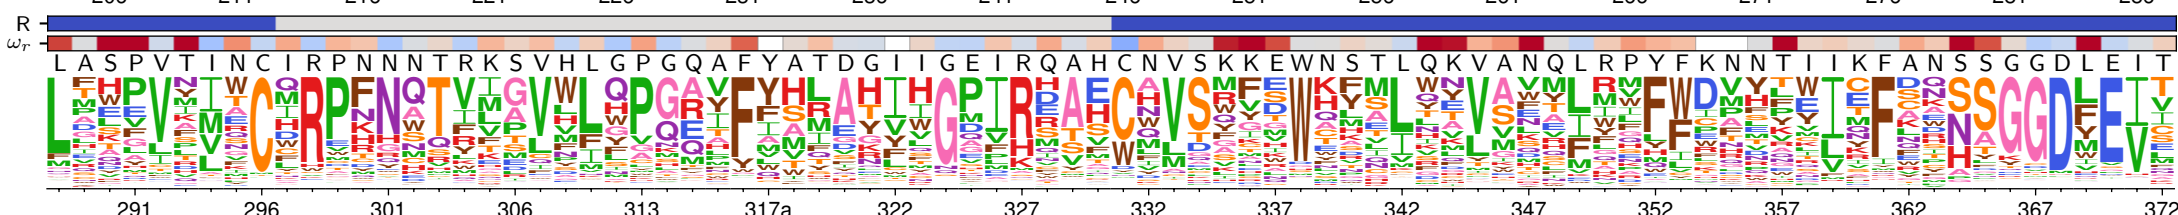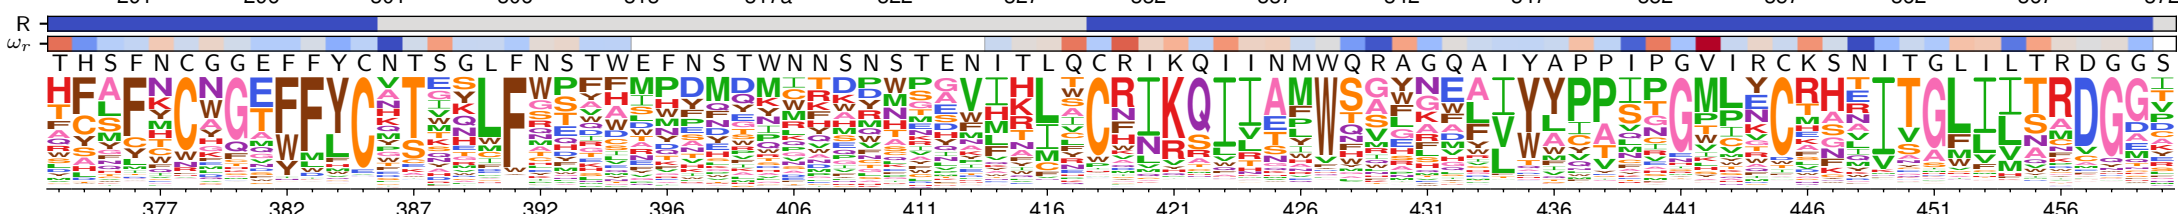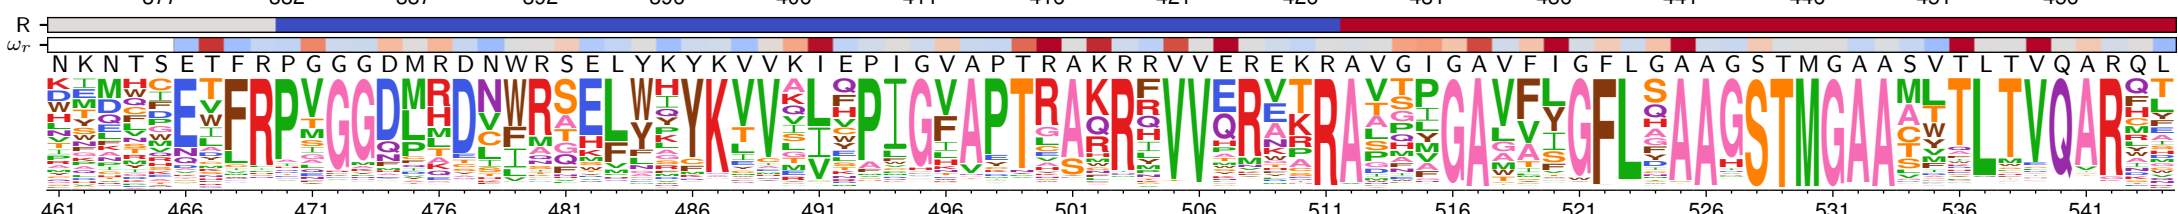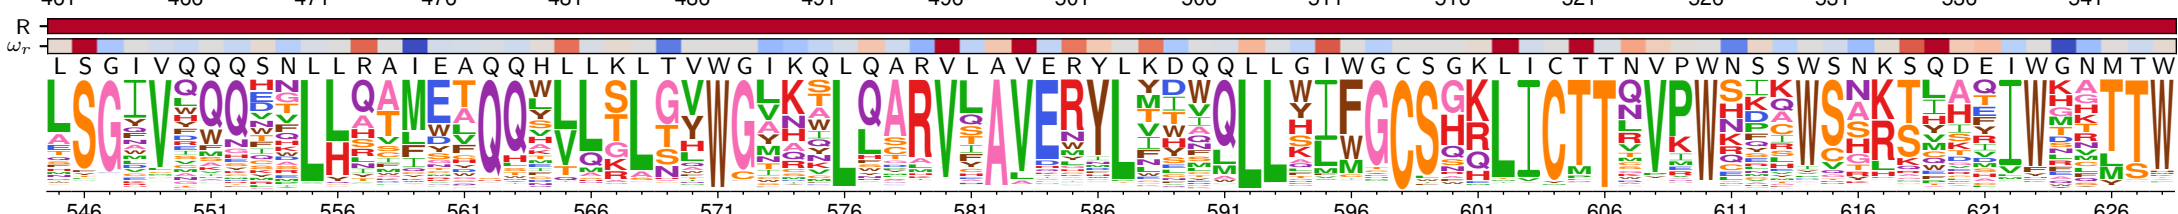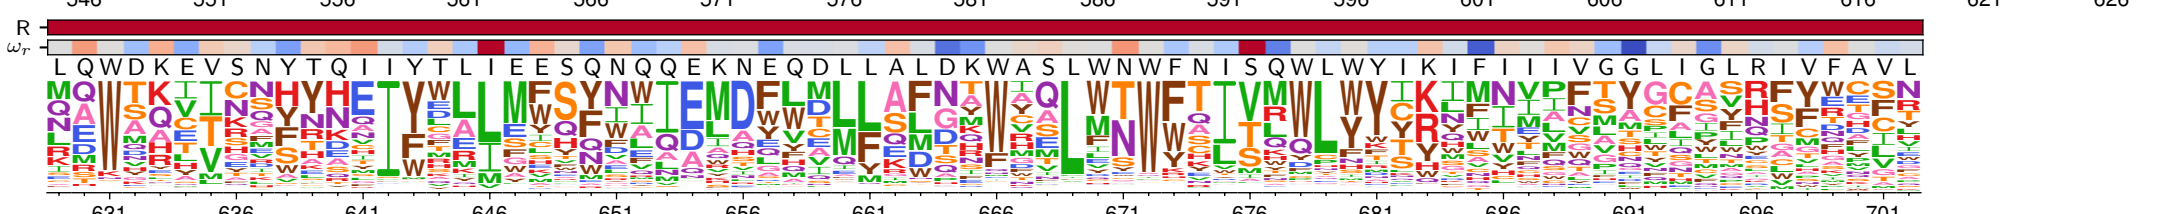

Supplement: supp [file BF520_prefs.pdf › analysis_code/results/prefs/BF520_prefs.pdf]

BF520-2

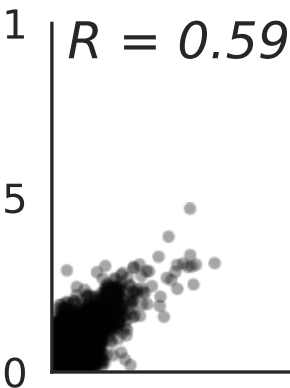

BF520-3

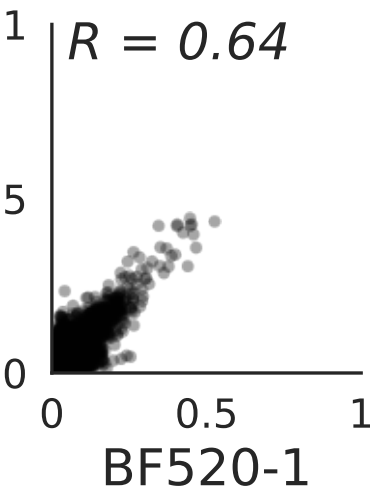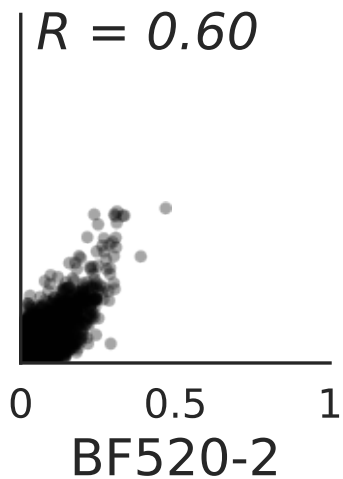

Supplement: supp [file BF520_prefscorr.pdf › analysis_code/results/prefs/BF520_prefscorr.pdf]

$\omega_r < 1 \leftarrow \log_{10} I \rightarrow \omega_r > 1 (\omega_r)$

region (R)

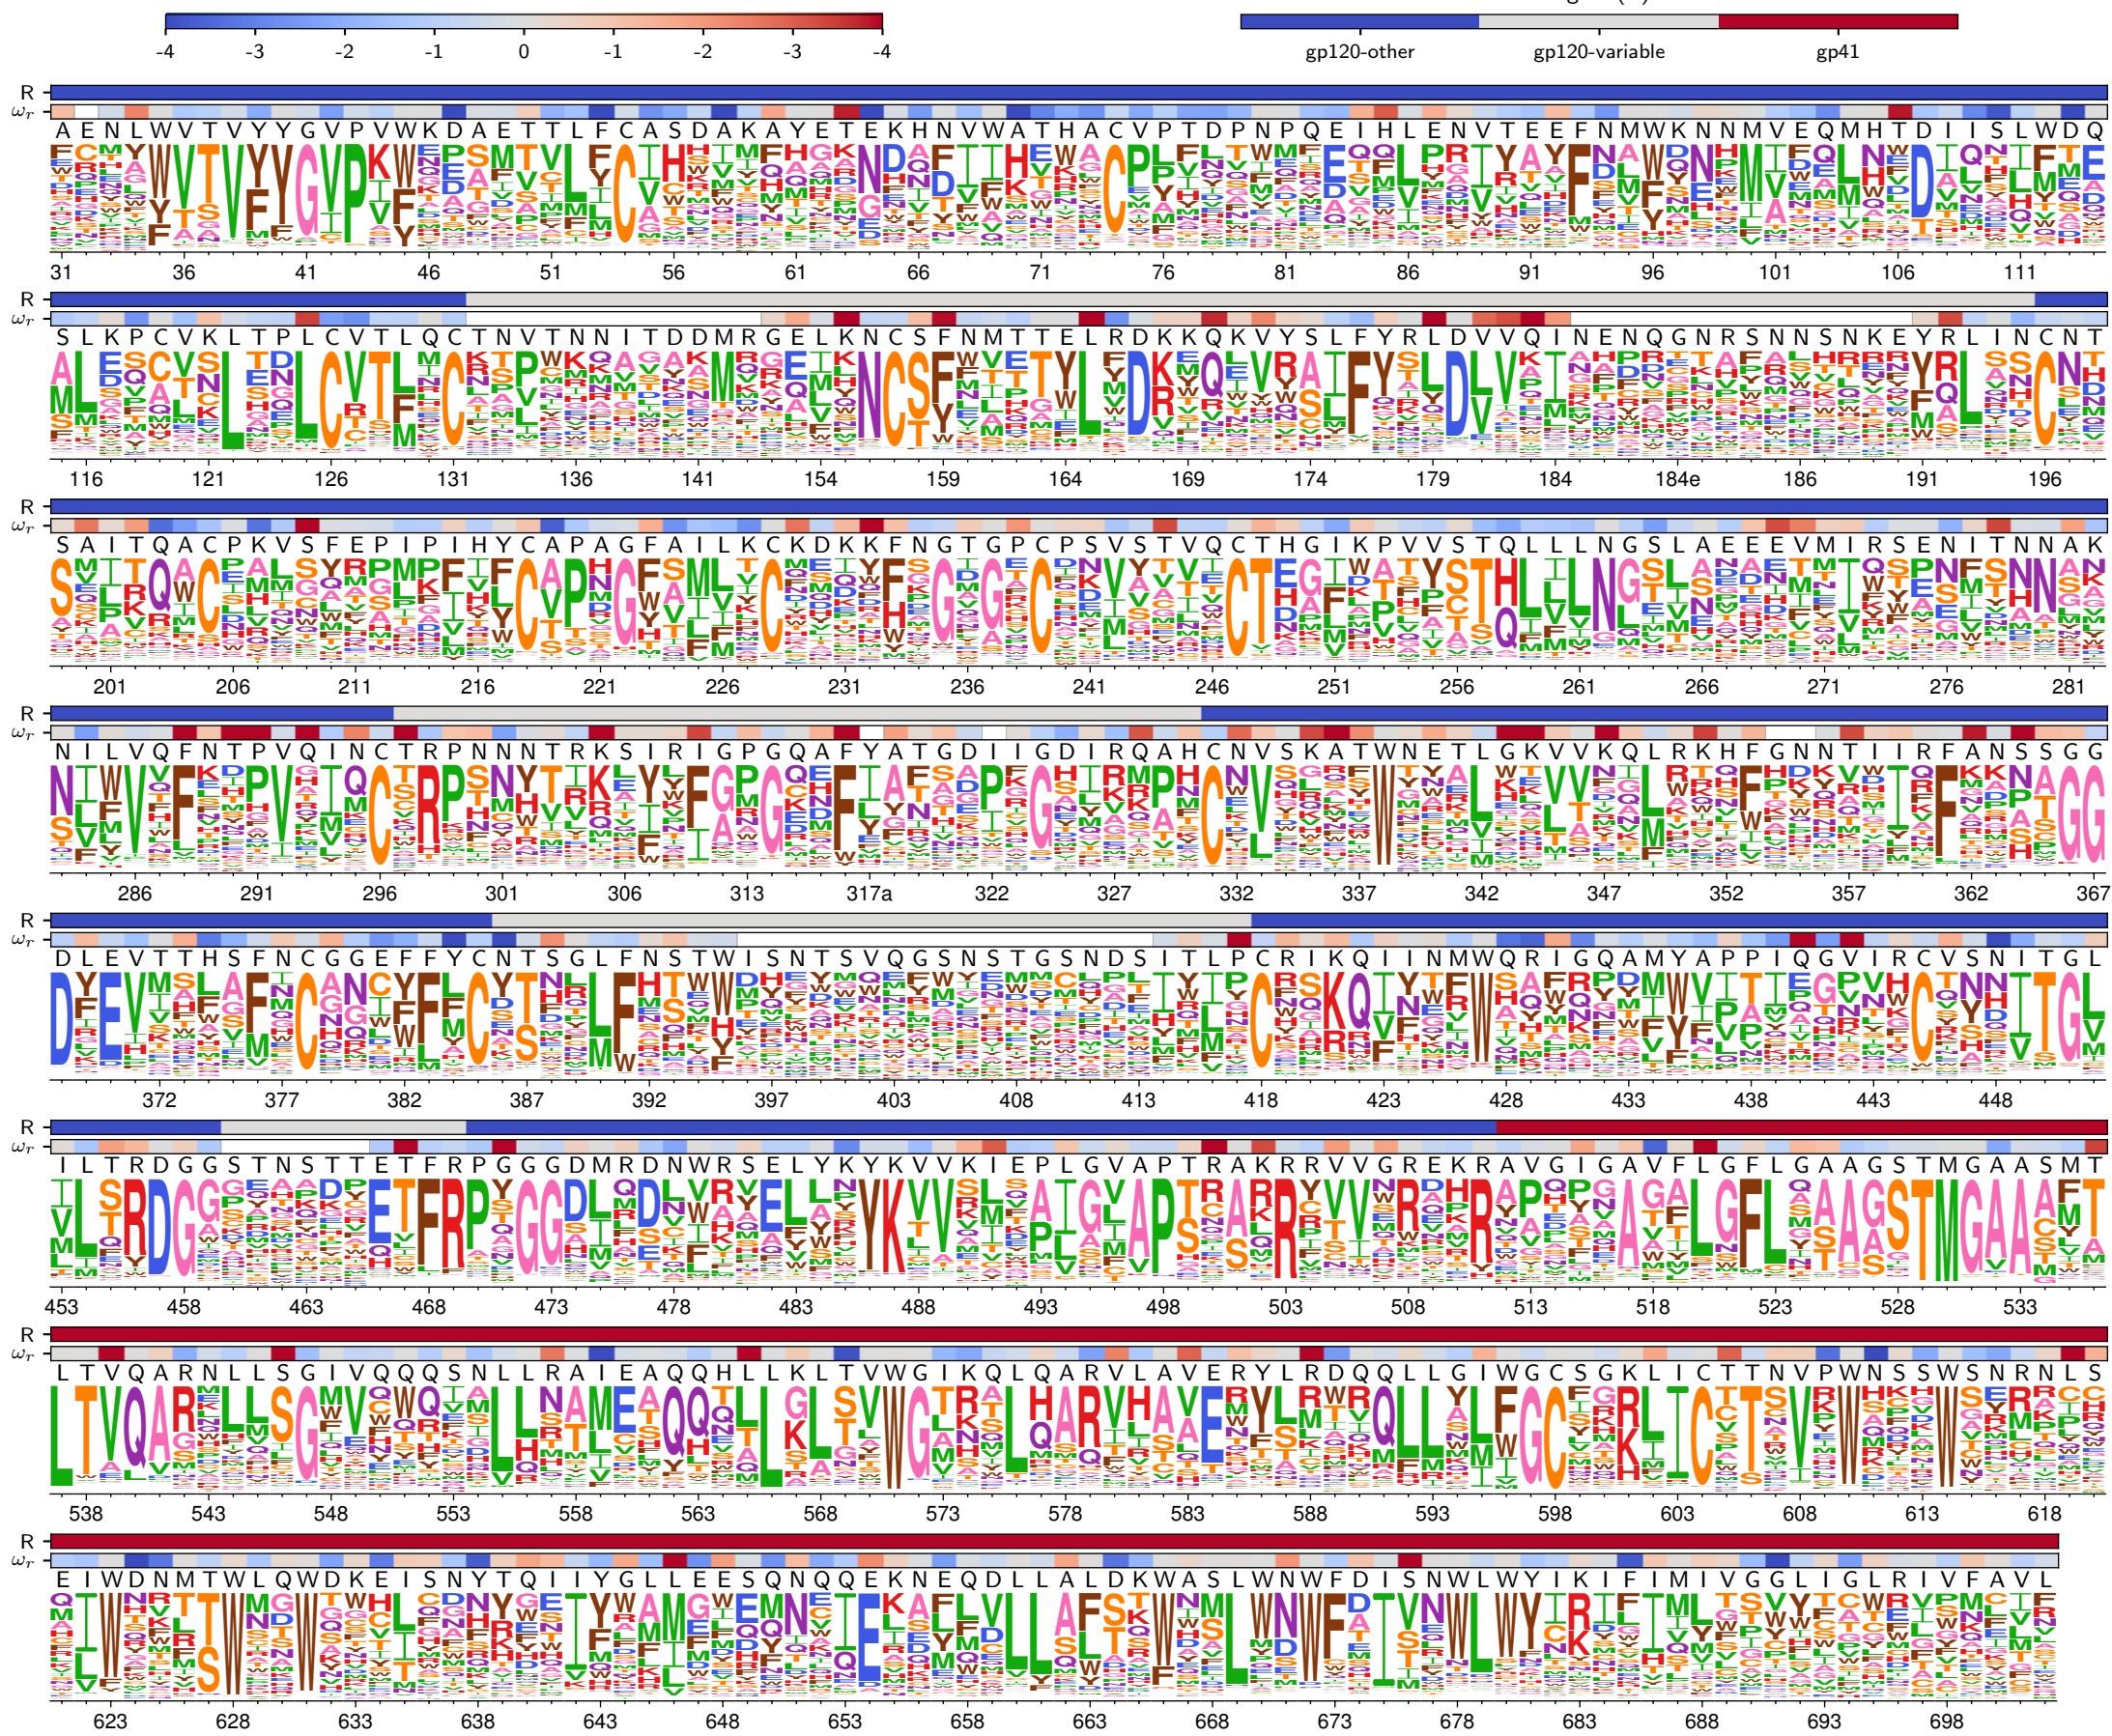

Supplement: supp [file BG505_prefs.pdf › analysis_code/results/prefs/BG505_prefs.pdf]

BG505-2

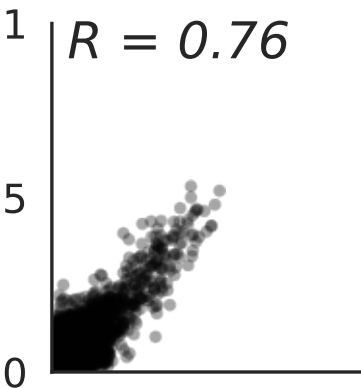

BG505-3

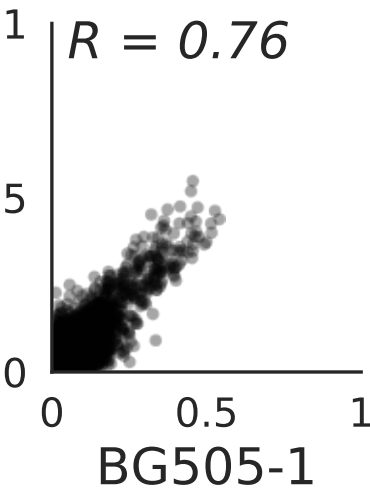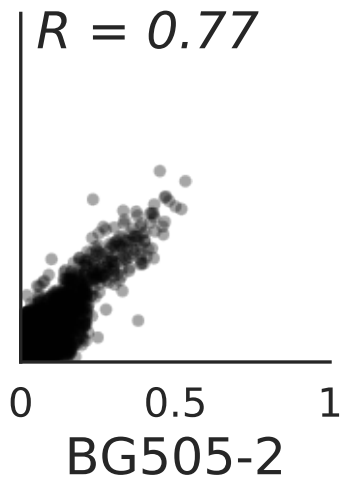

Supplement: supp [file BG505_prefscorr.pdf › analysis_code/results/prefs/BG505_prefscorr.pdf]

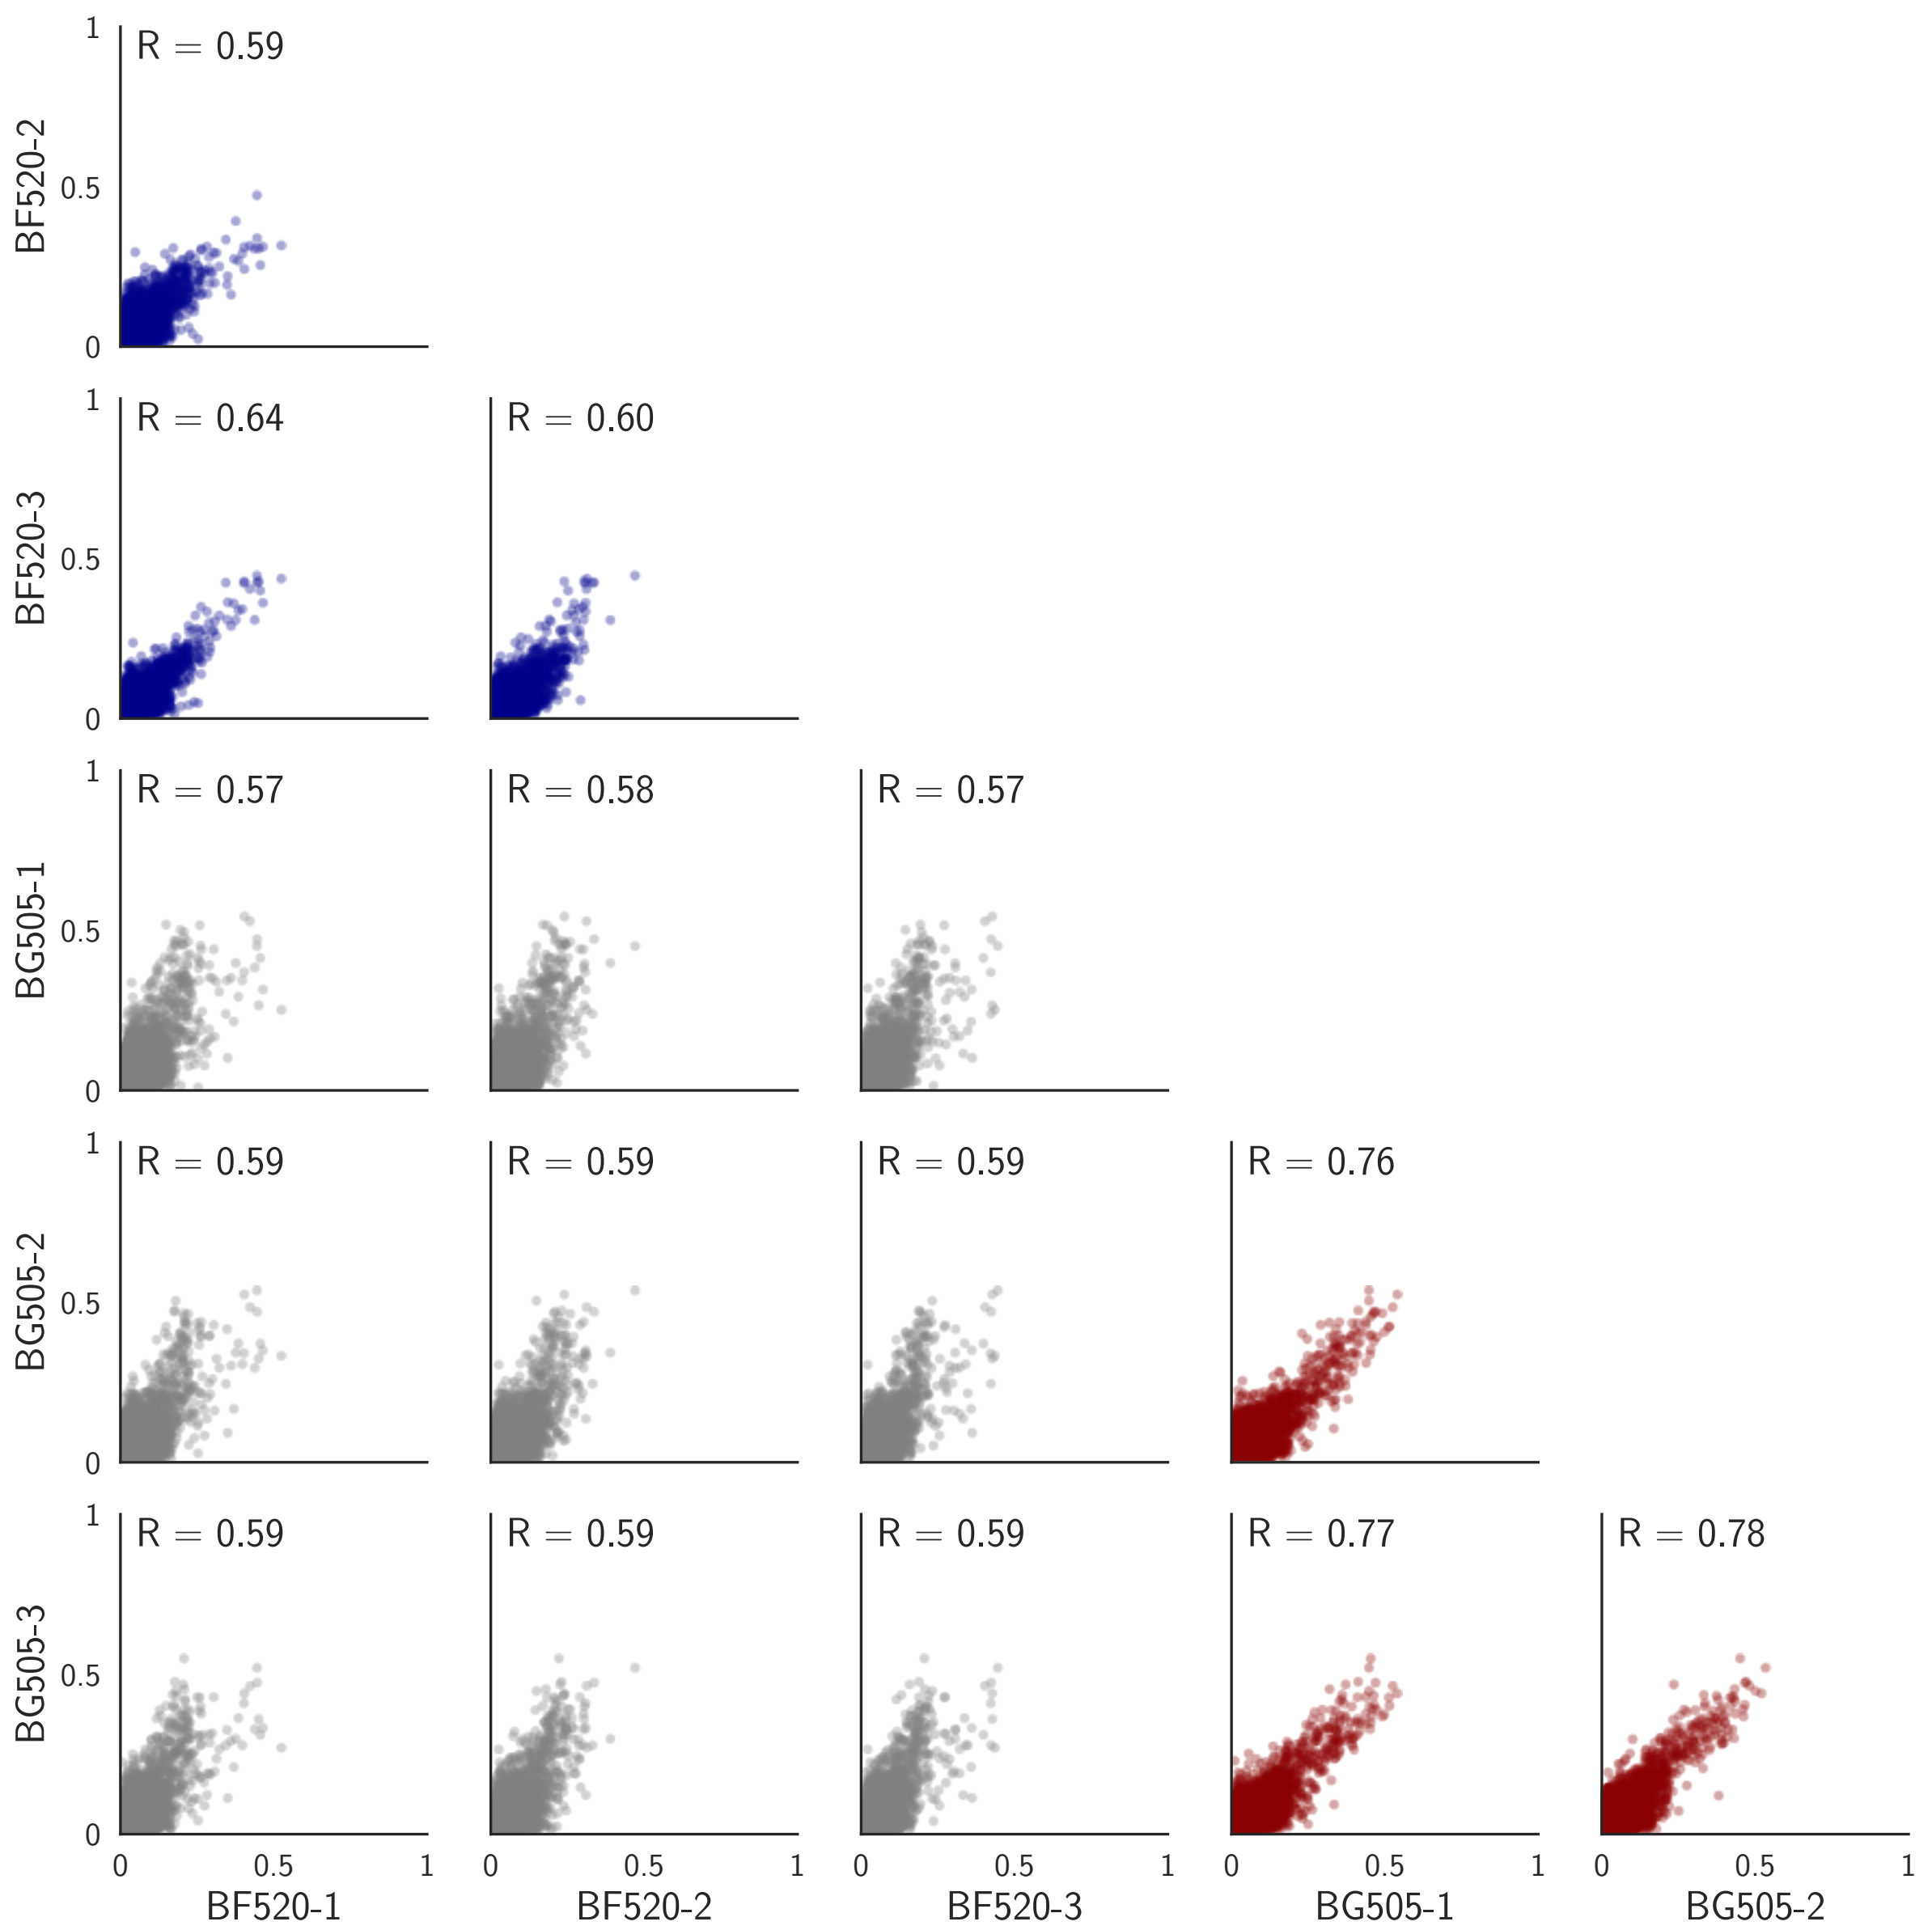

Supplement: supp [file allprefscorr.pdf › analysis_code/results/prefs/allprefscorr.pdf]

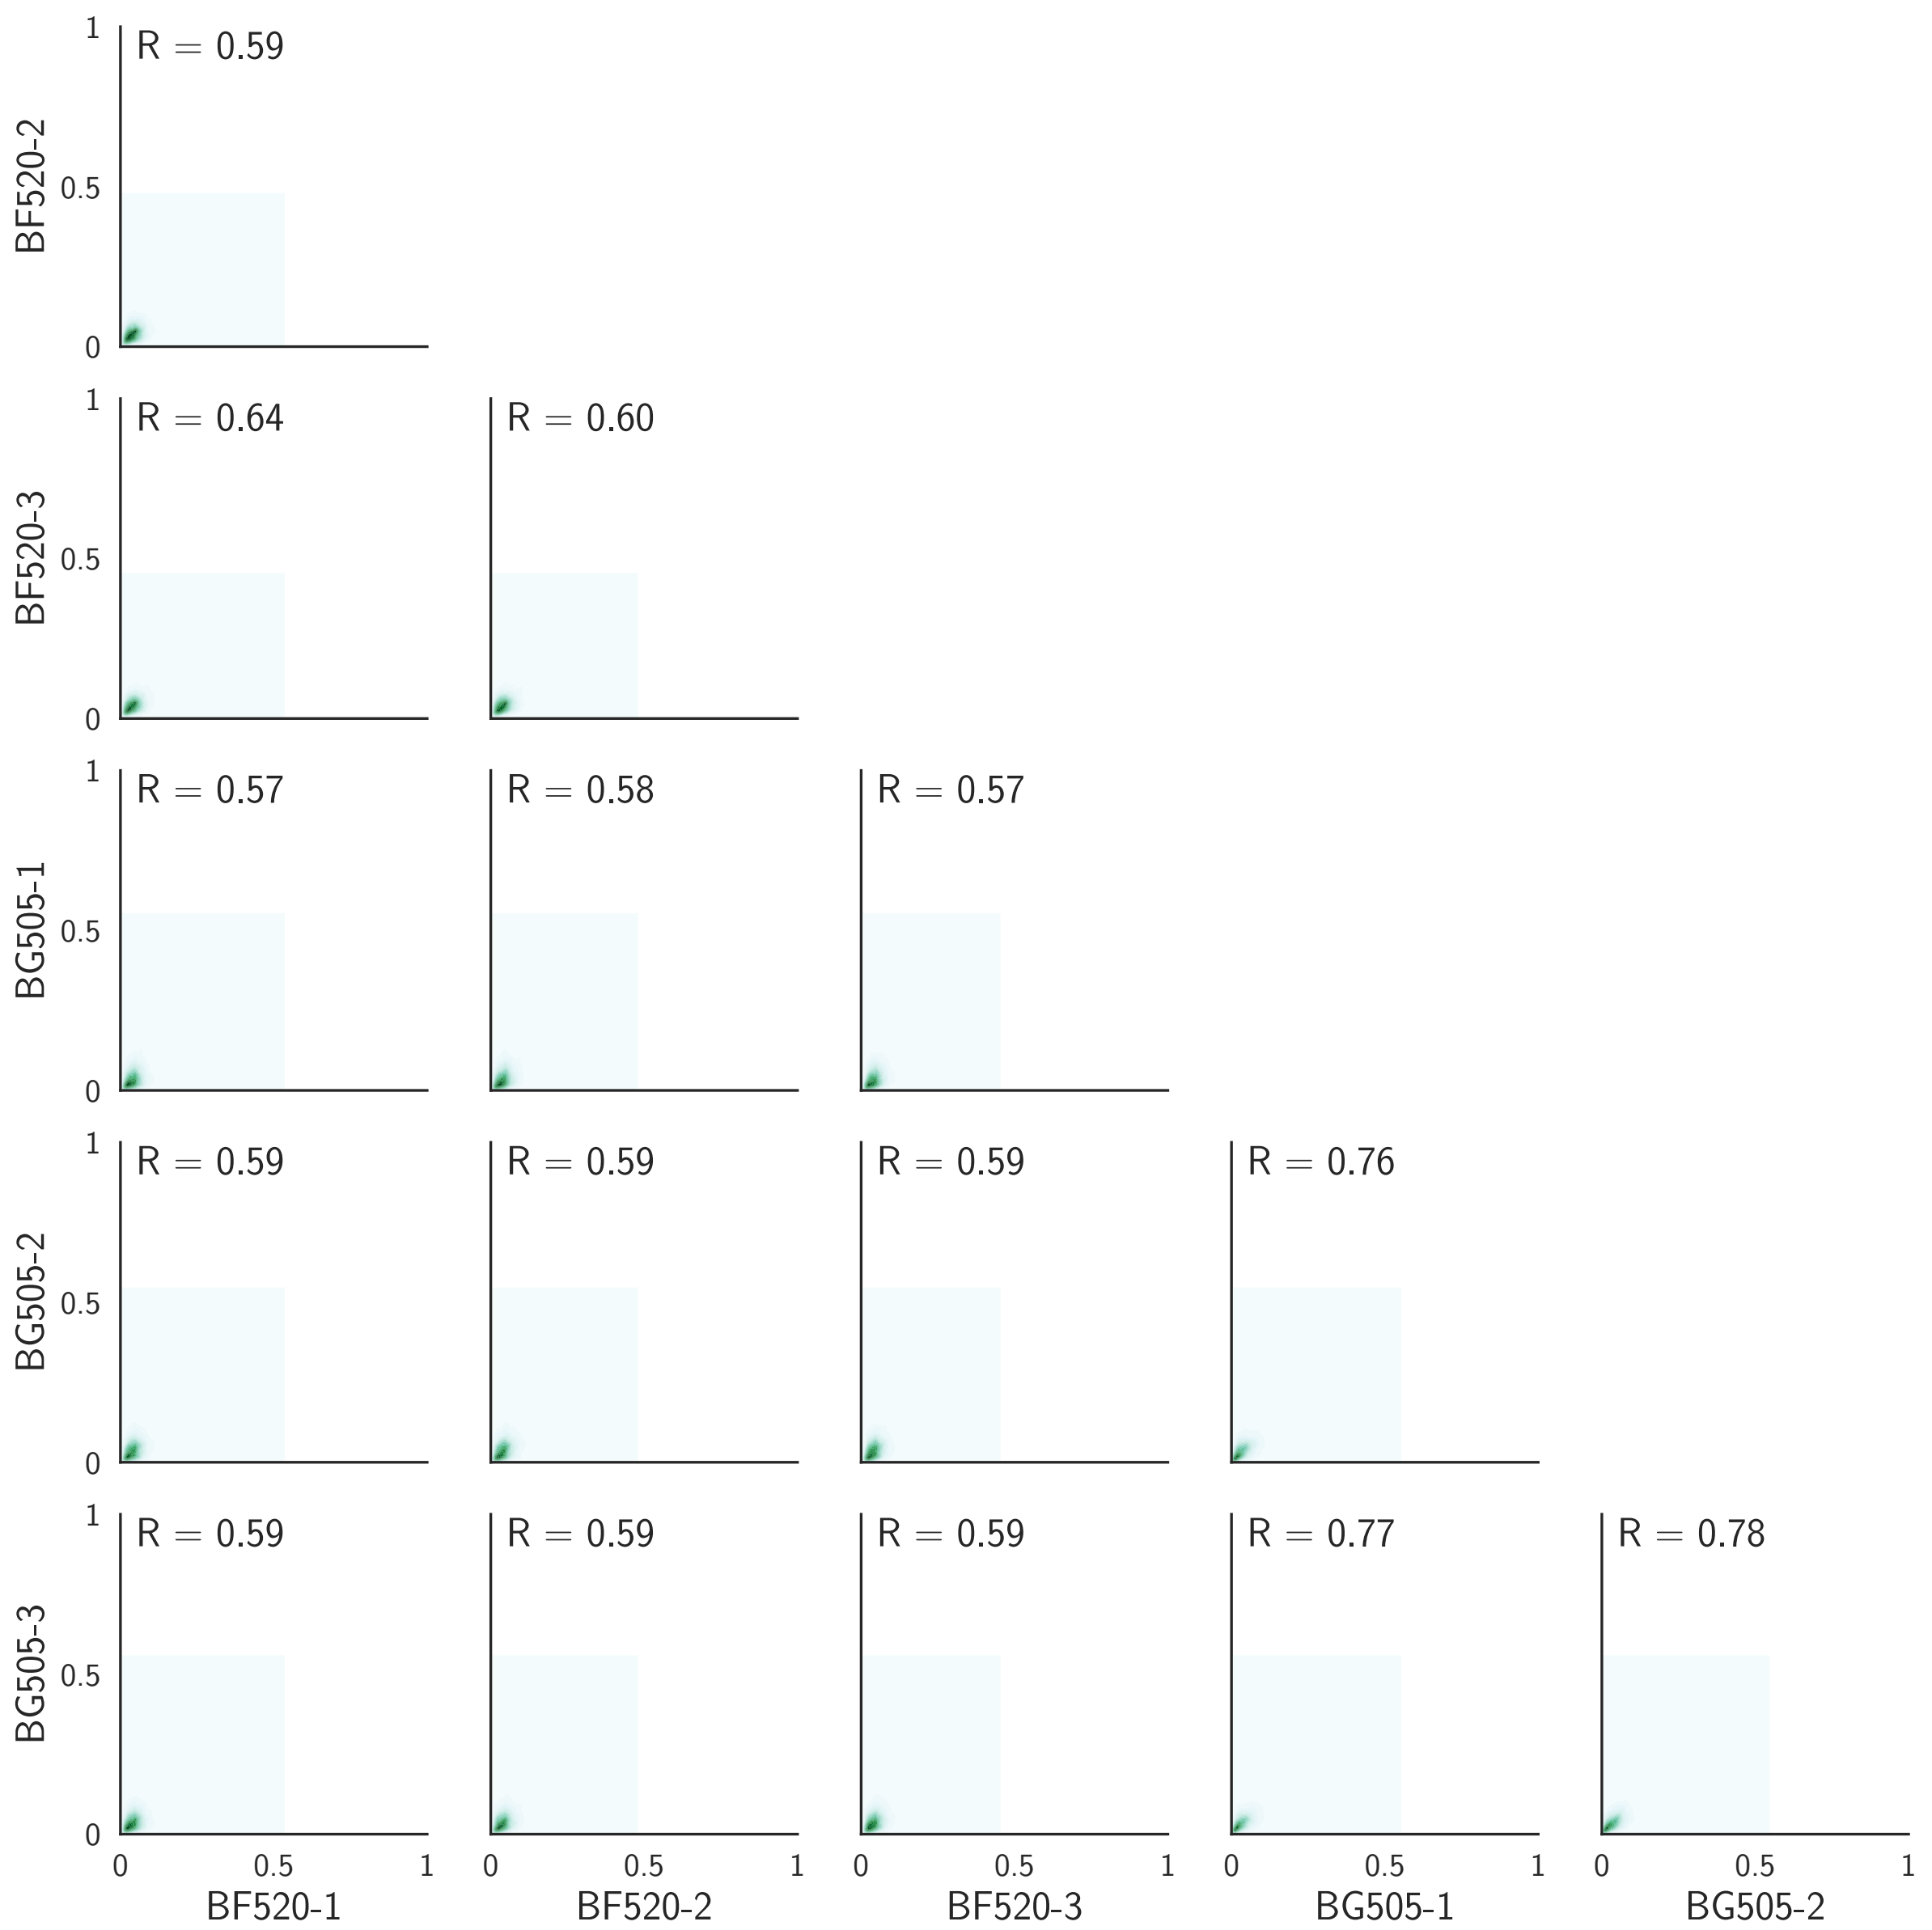

Supplement: supp [file allprefscorr_contour.pdf › analysis_code/results/prefs/allprefscorr_contour.pdf]

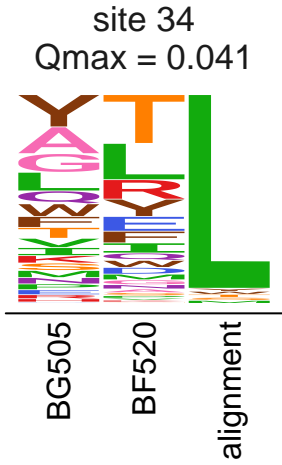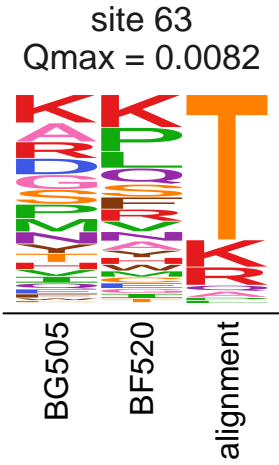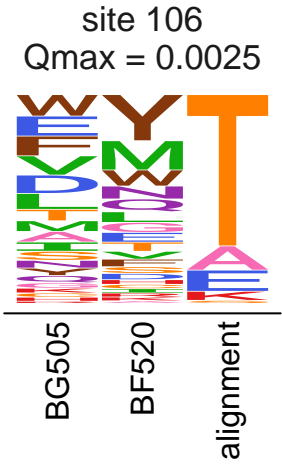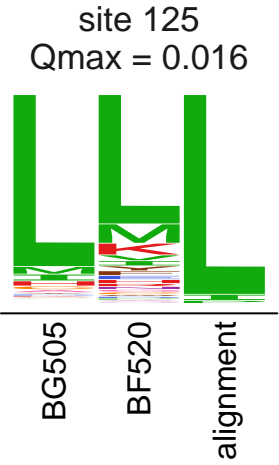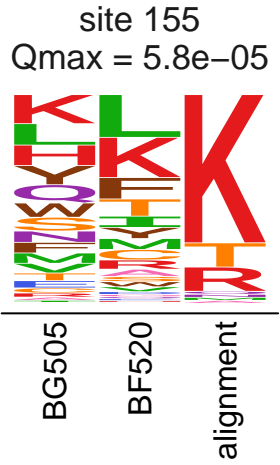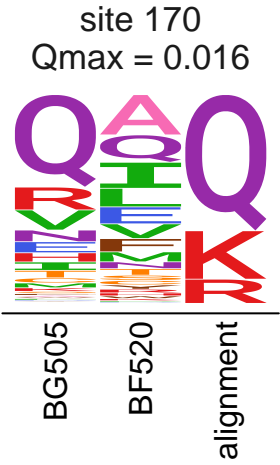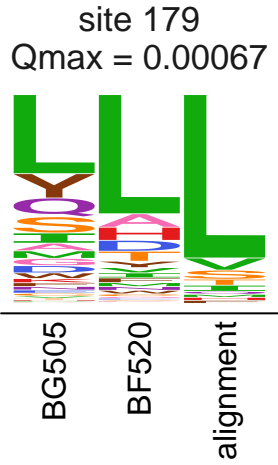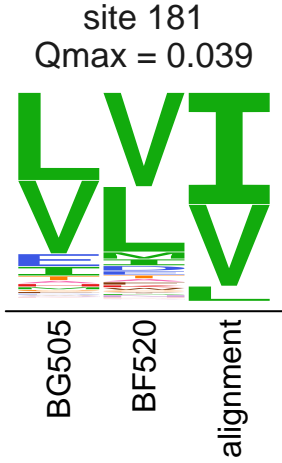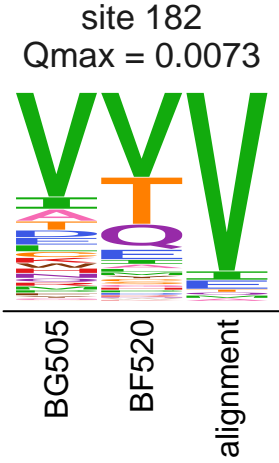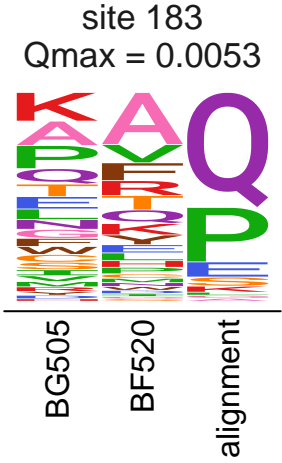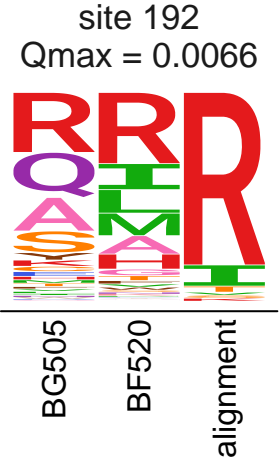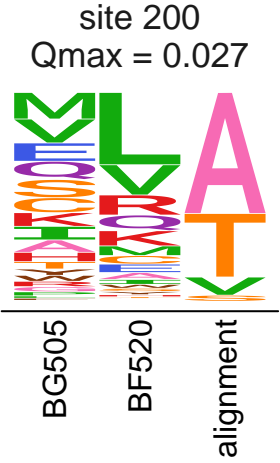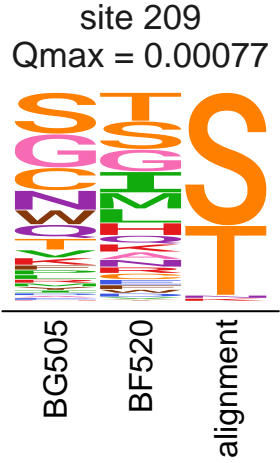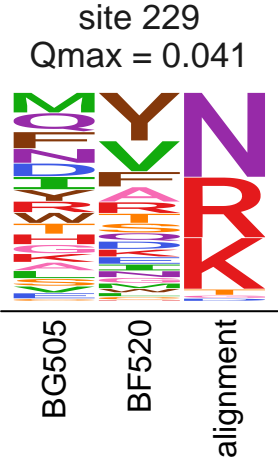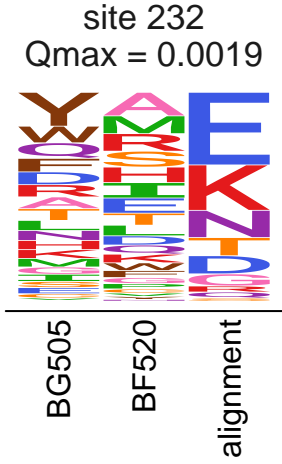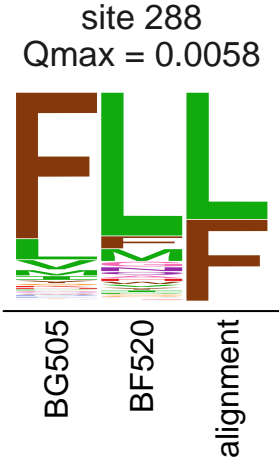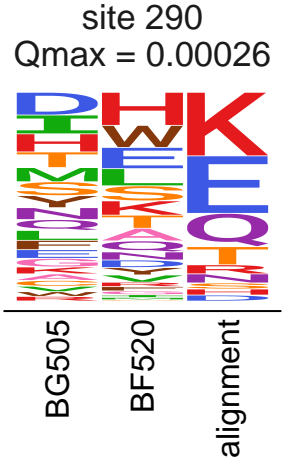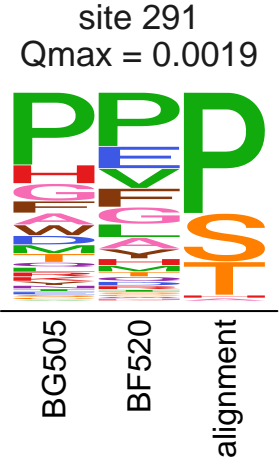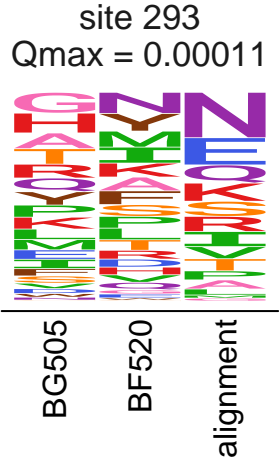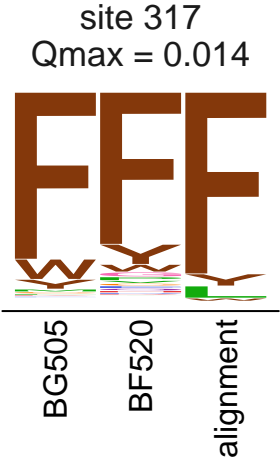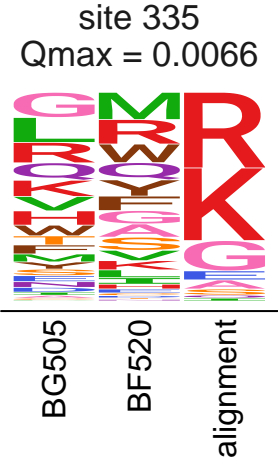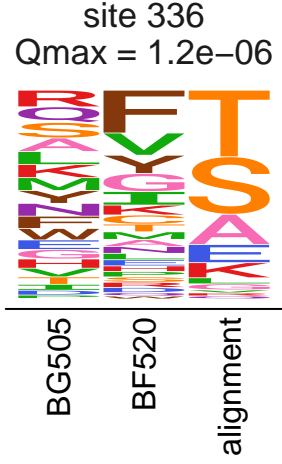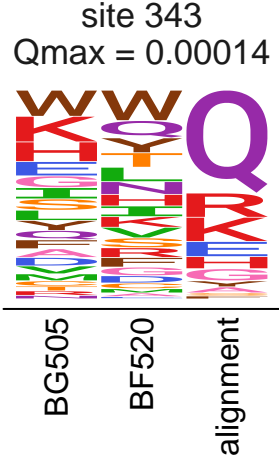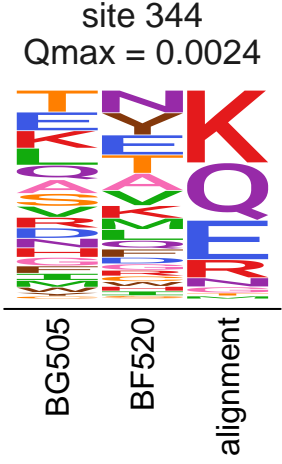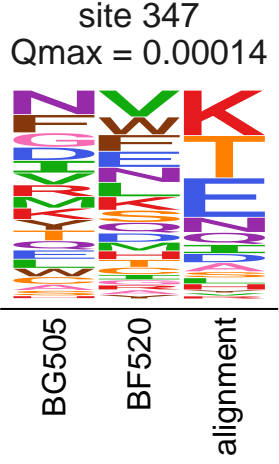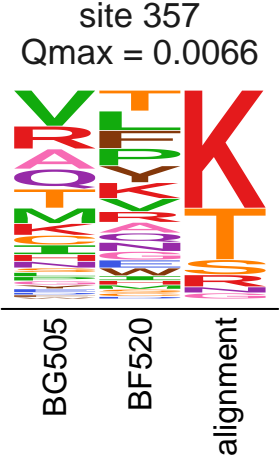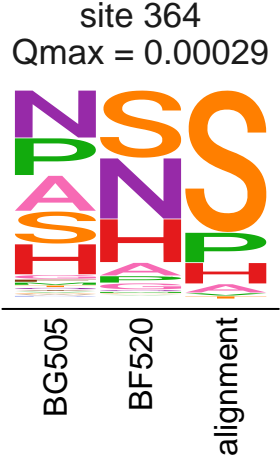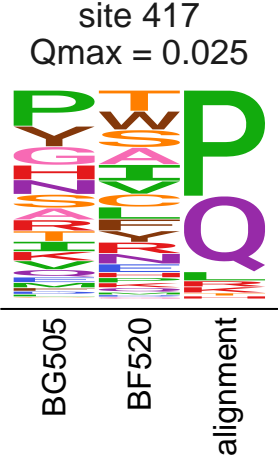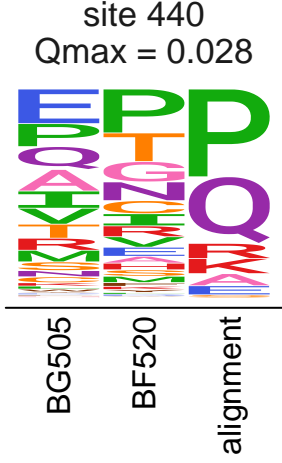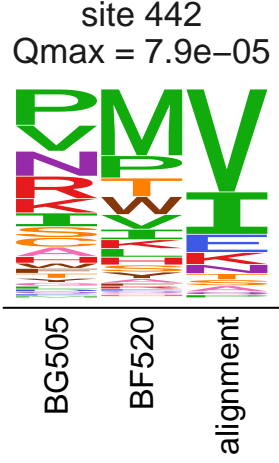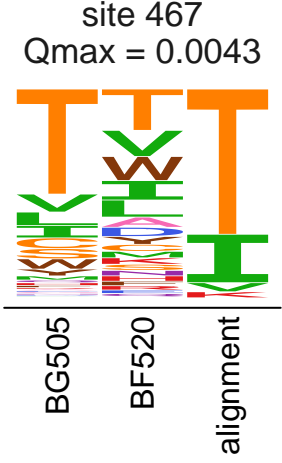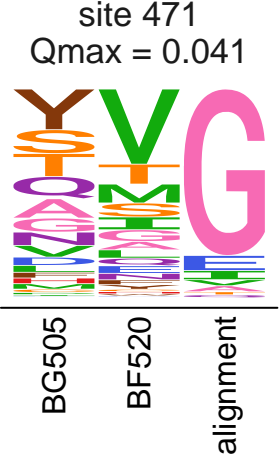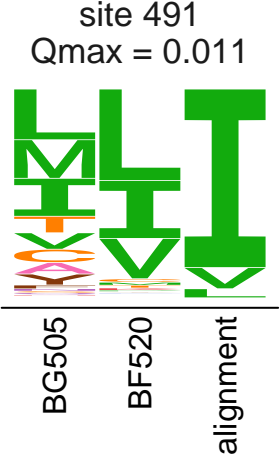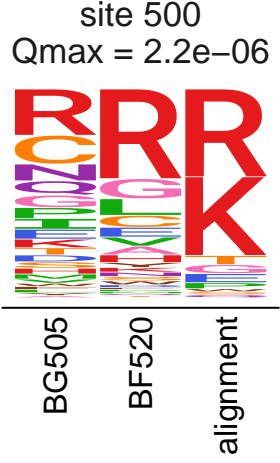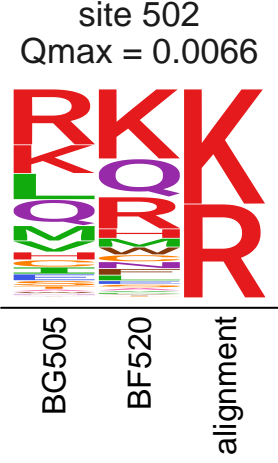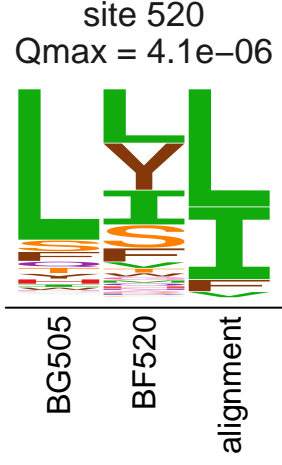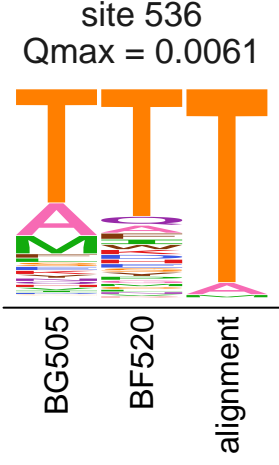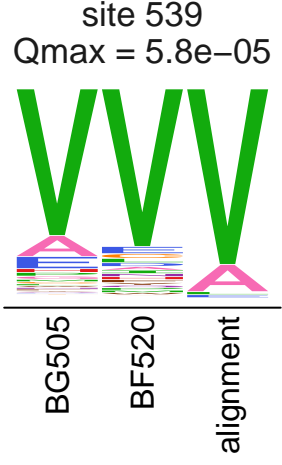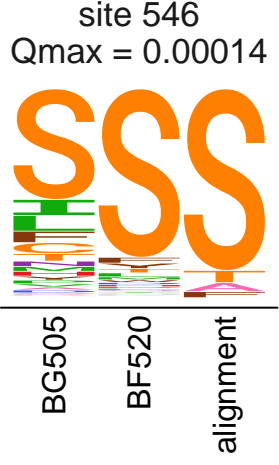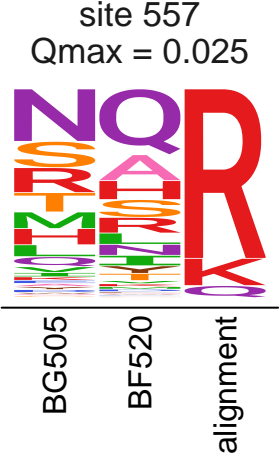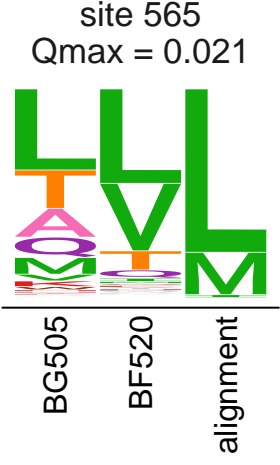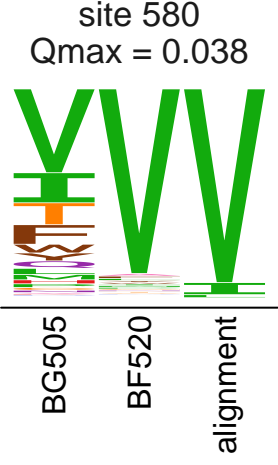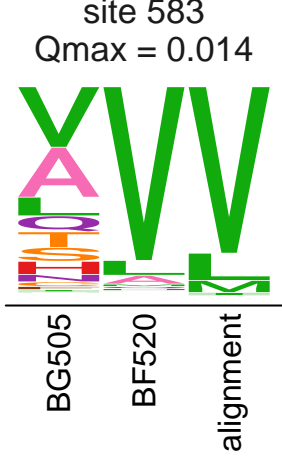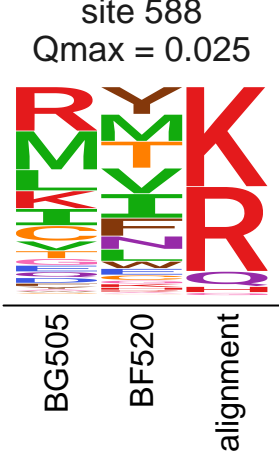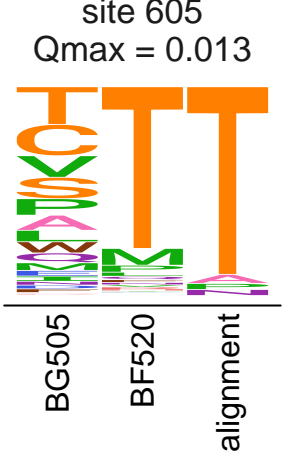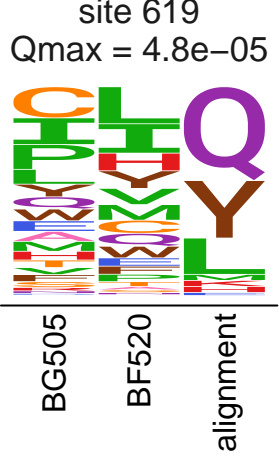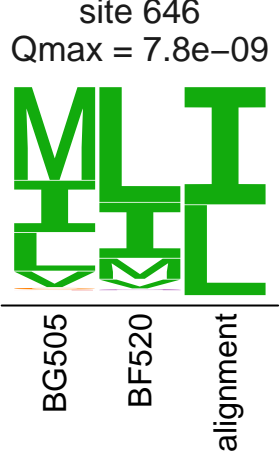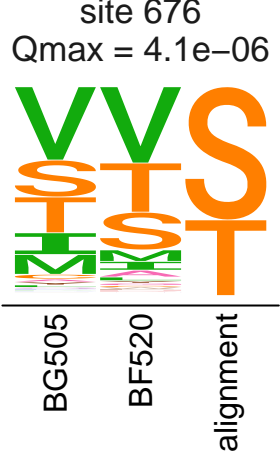

Supplement: supp [file diversifying_selsites.pdf › analysis_code/results/prefs/diversifying_selsites.pdf]

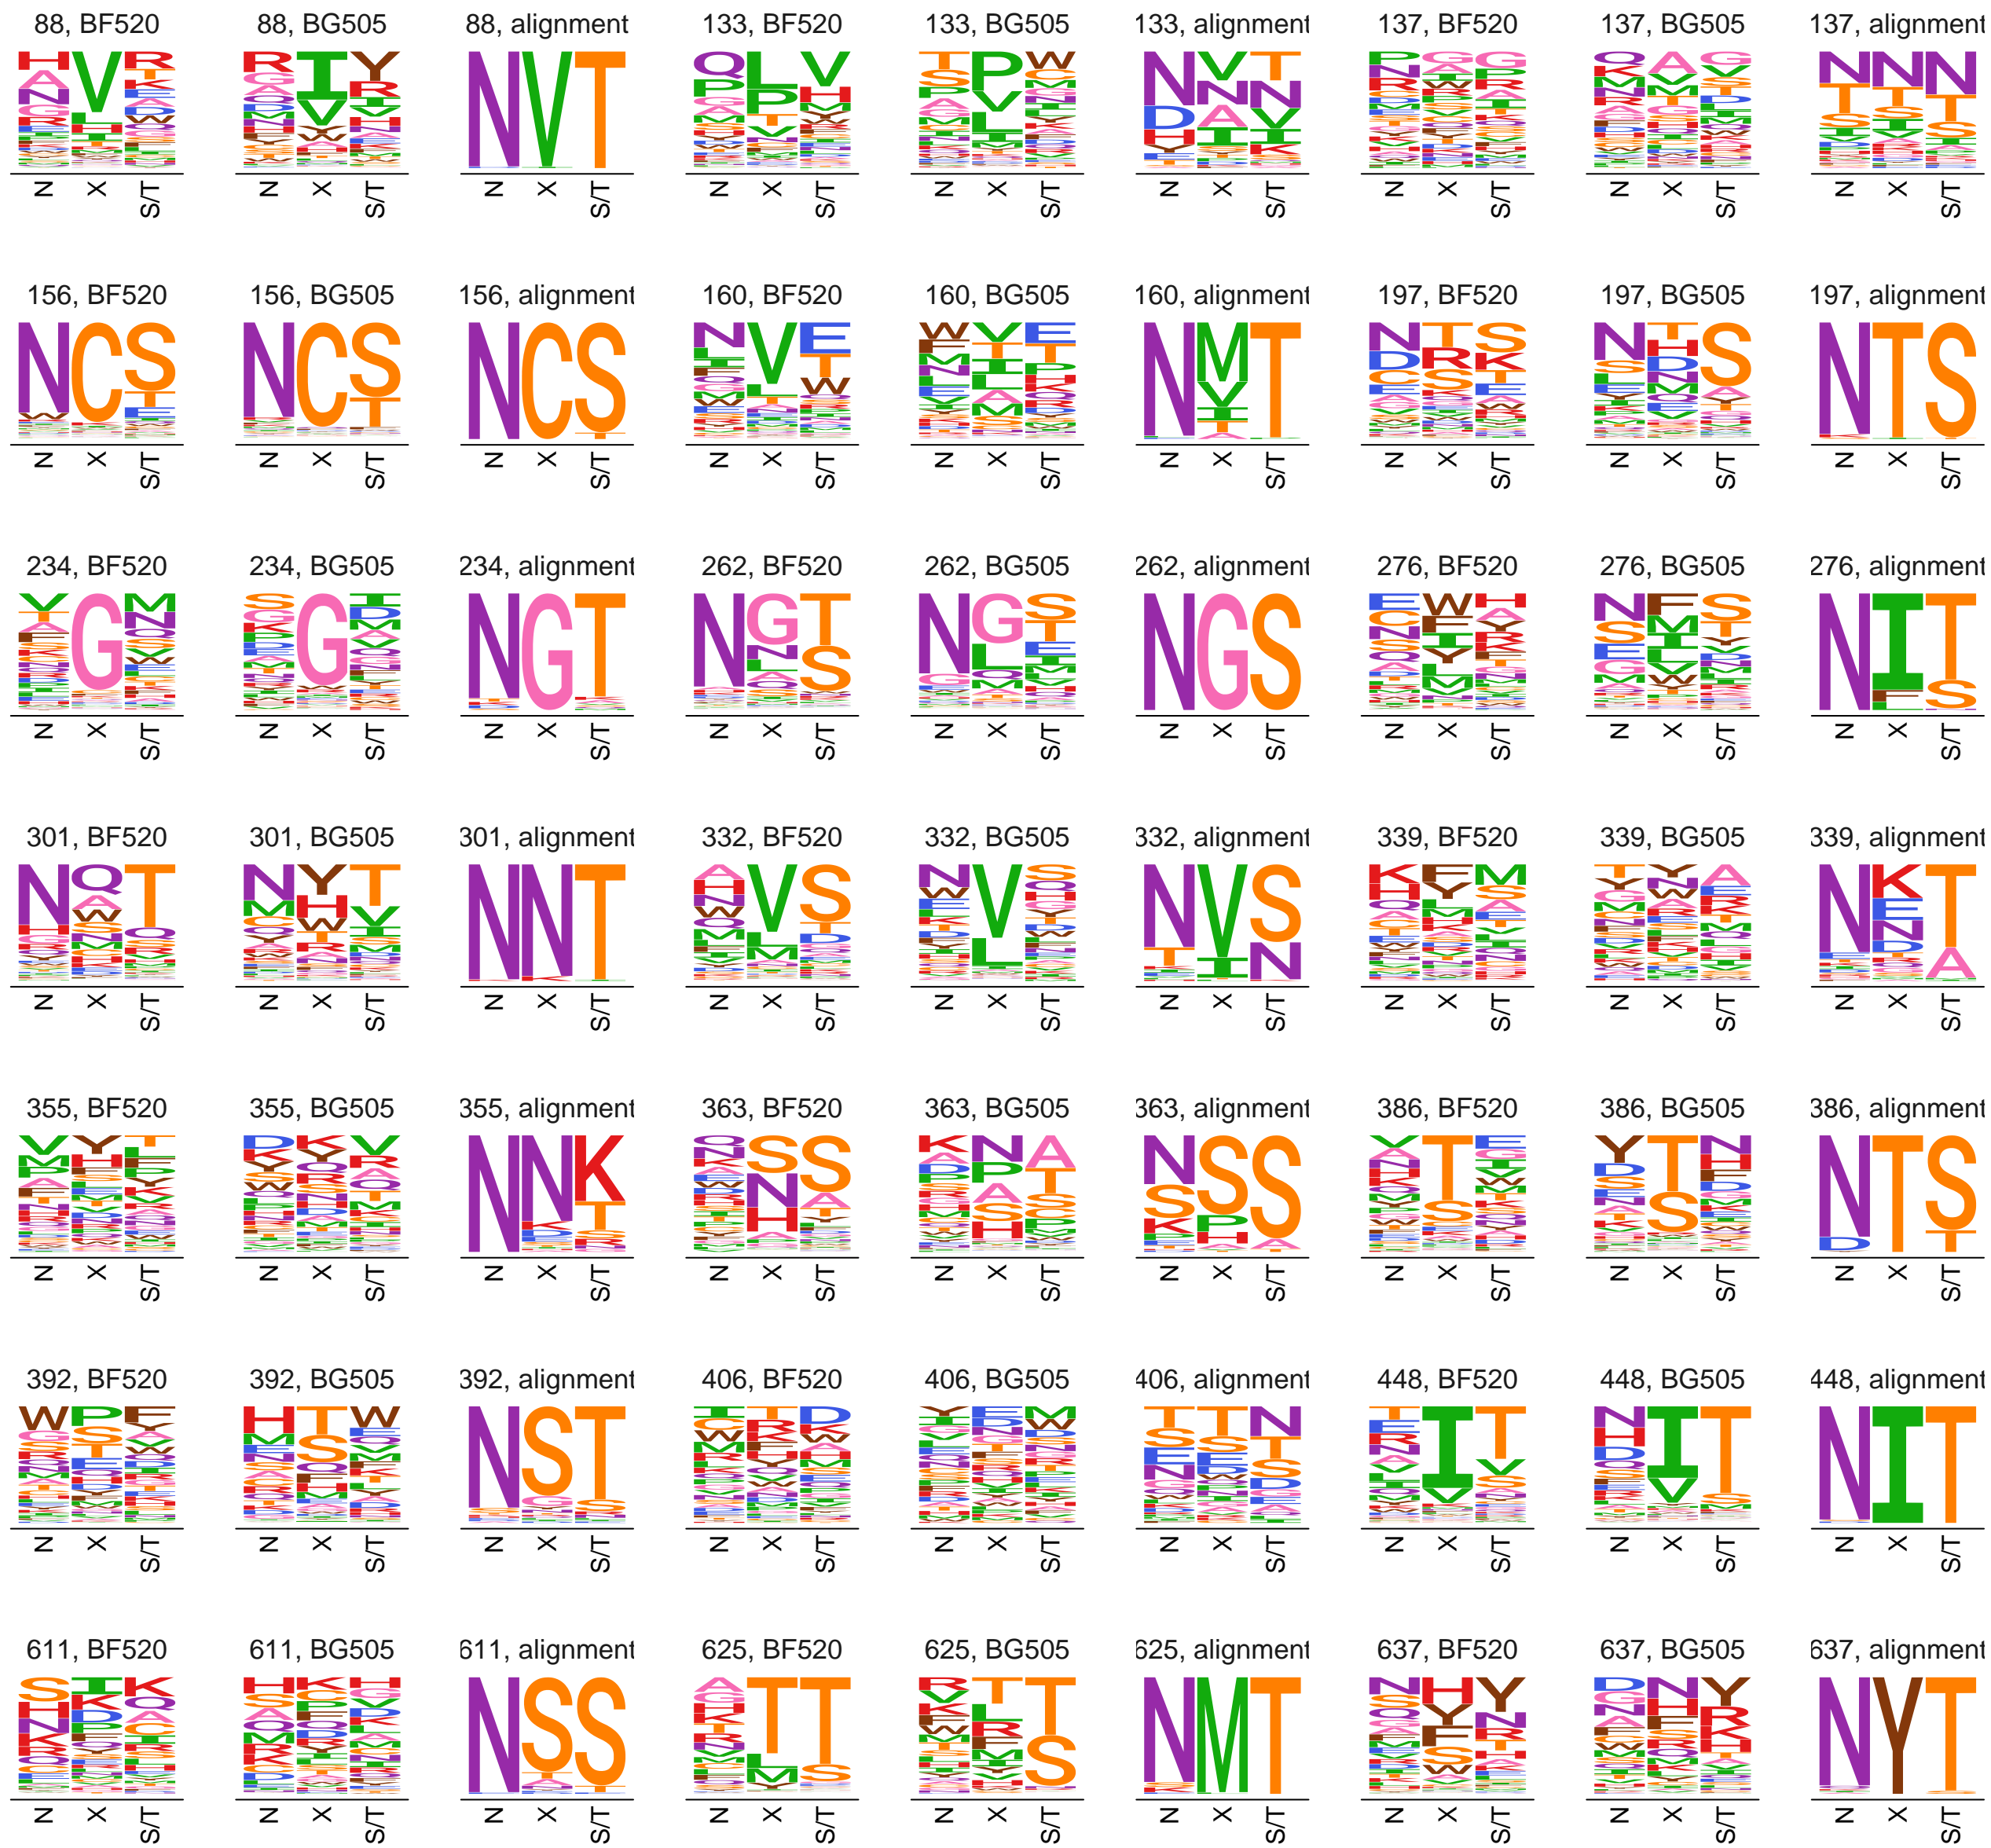

Supplement: supp [file glycan_prefs.pdf › analysis_code/results/prefs/glycan_prefs.pdf]

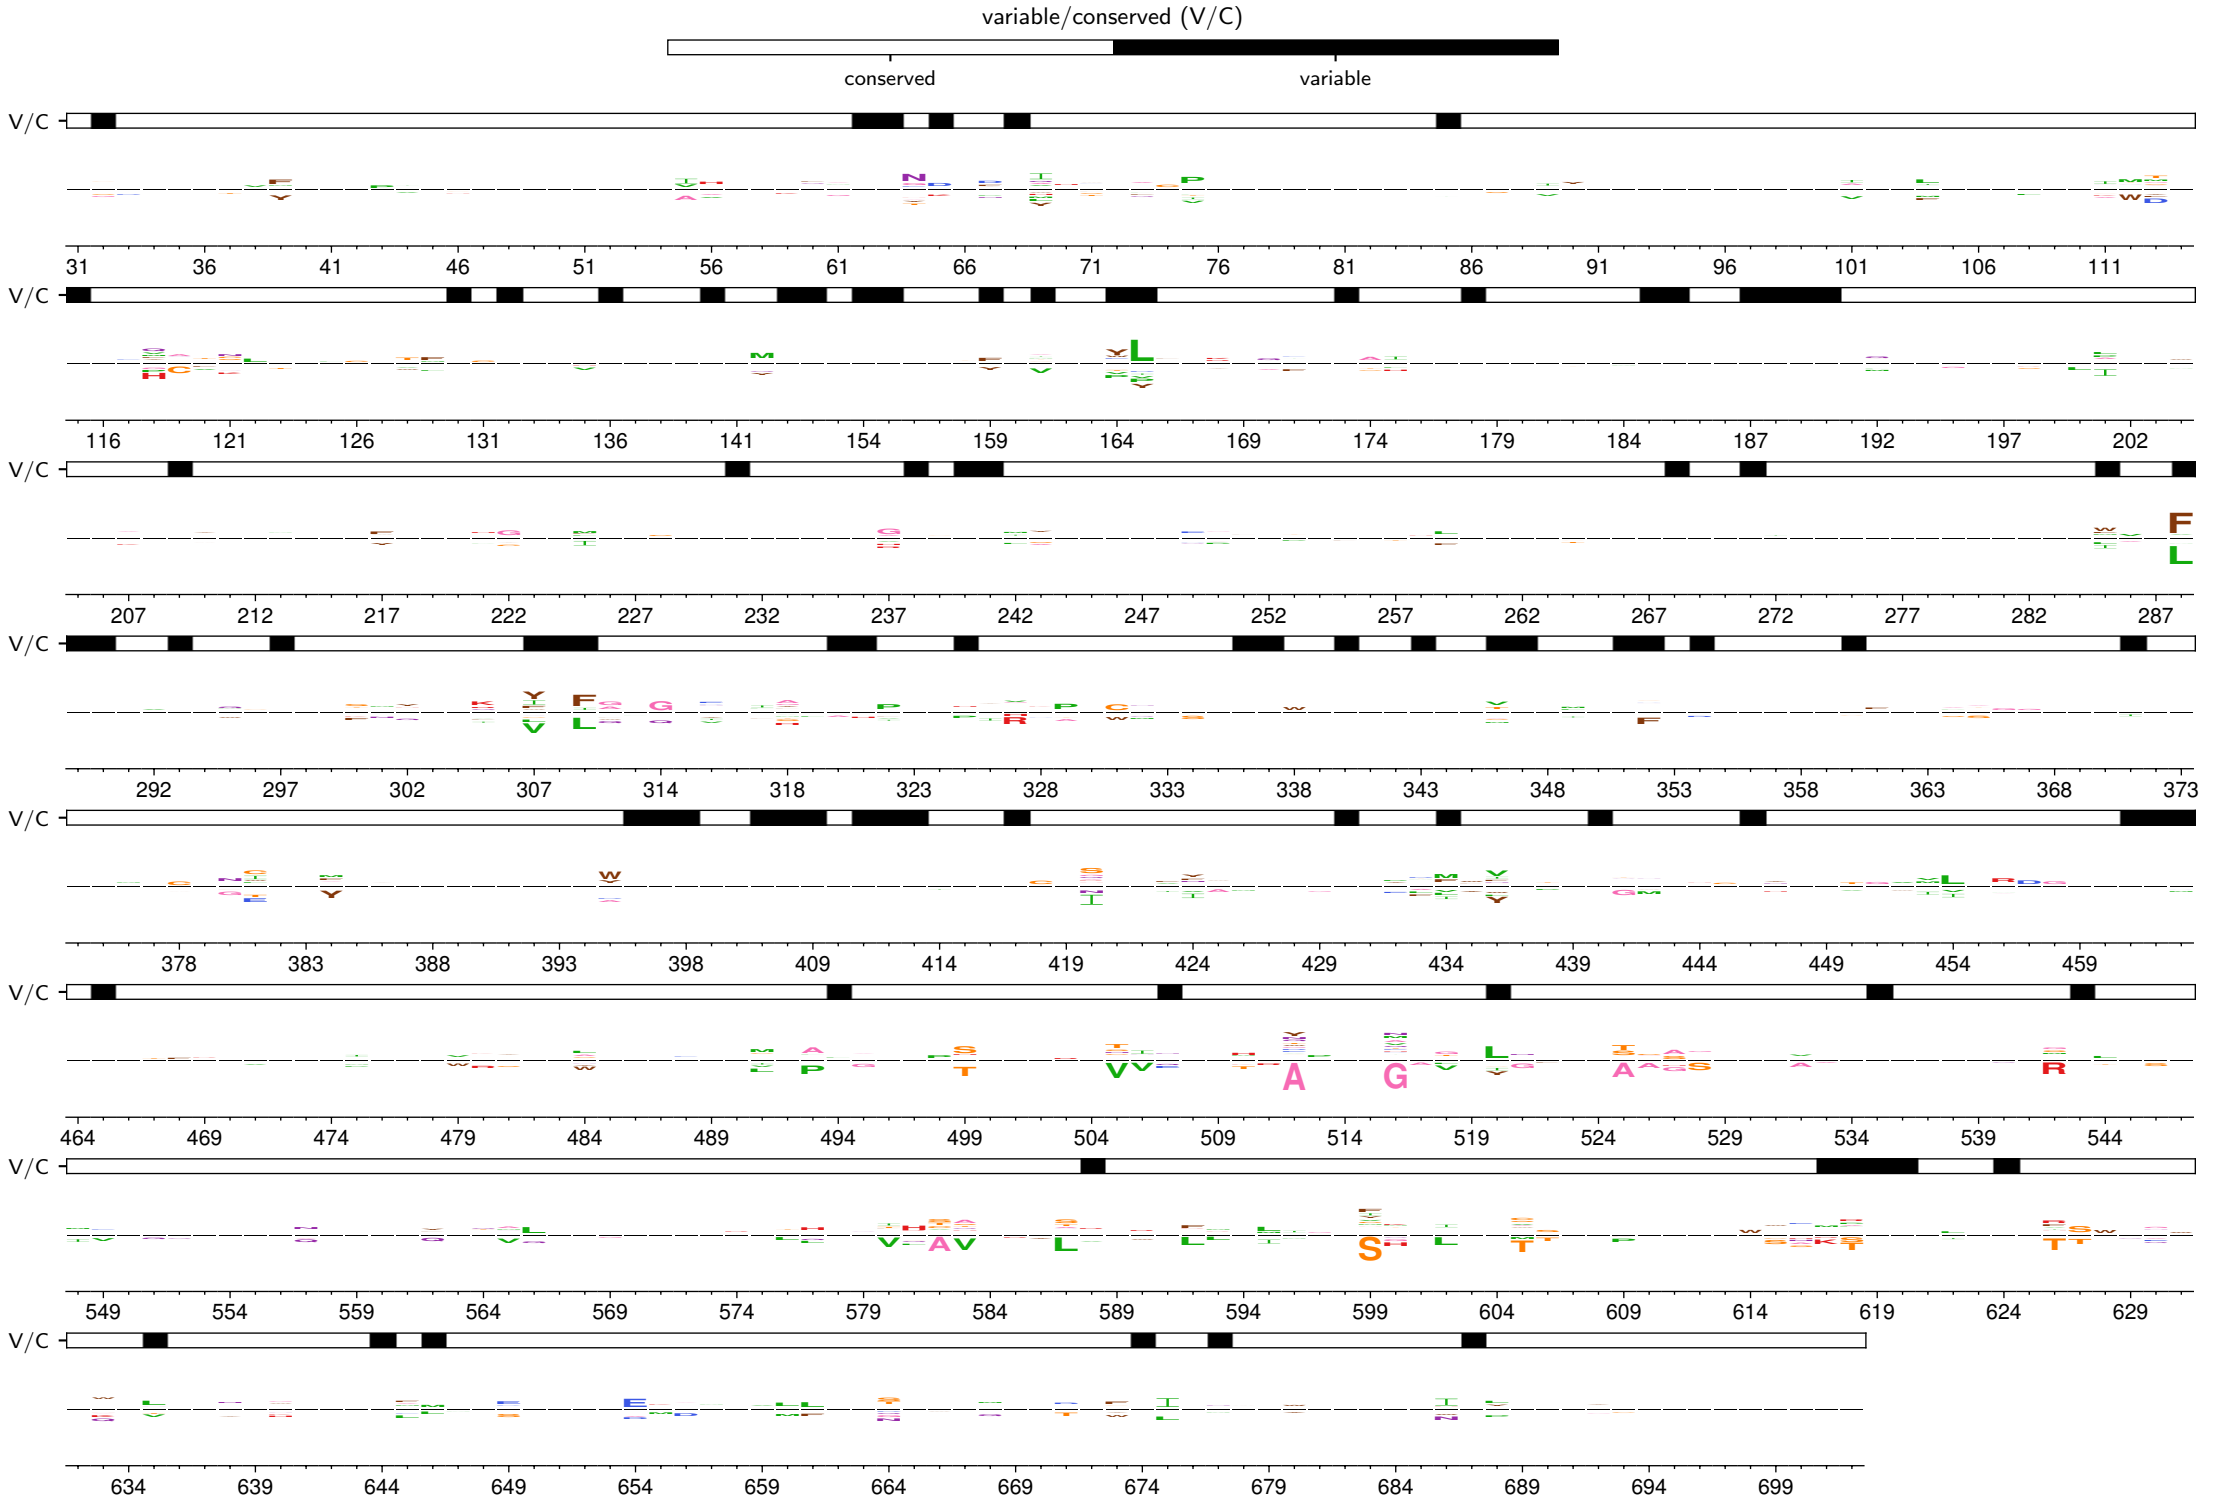

Supplement: supp [file BG505-to-BF520_diffprefs.pdf › analysis_code/results/prefsdist/BG505-to-BF520_diffprefs.pdf]

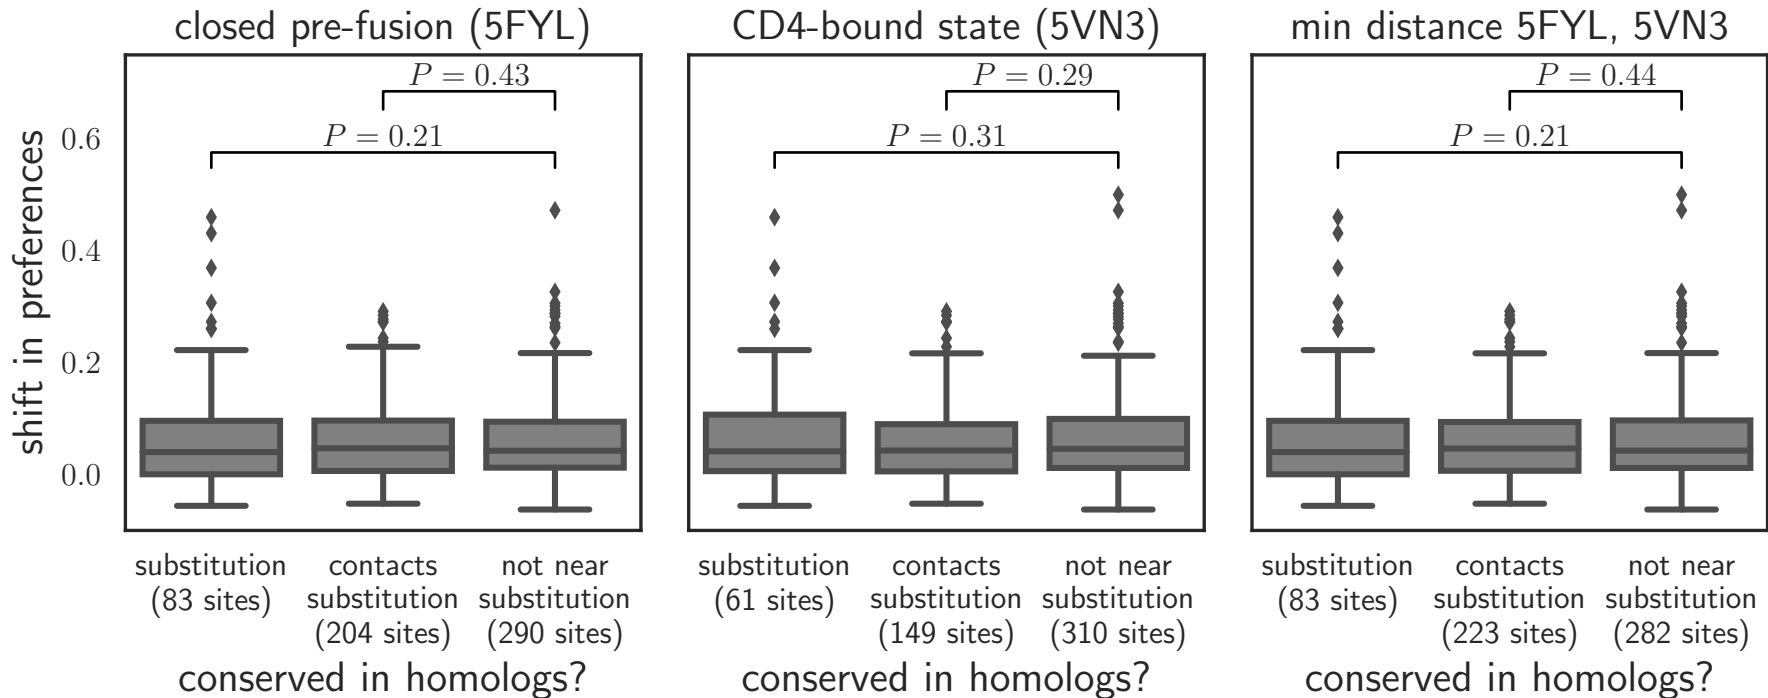

Supplement: supp [file conservation_vs_shifts.pdf › analysis_code/results/prefsdist/conservation_vs_shifts.pdf]

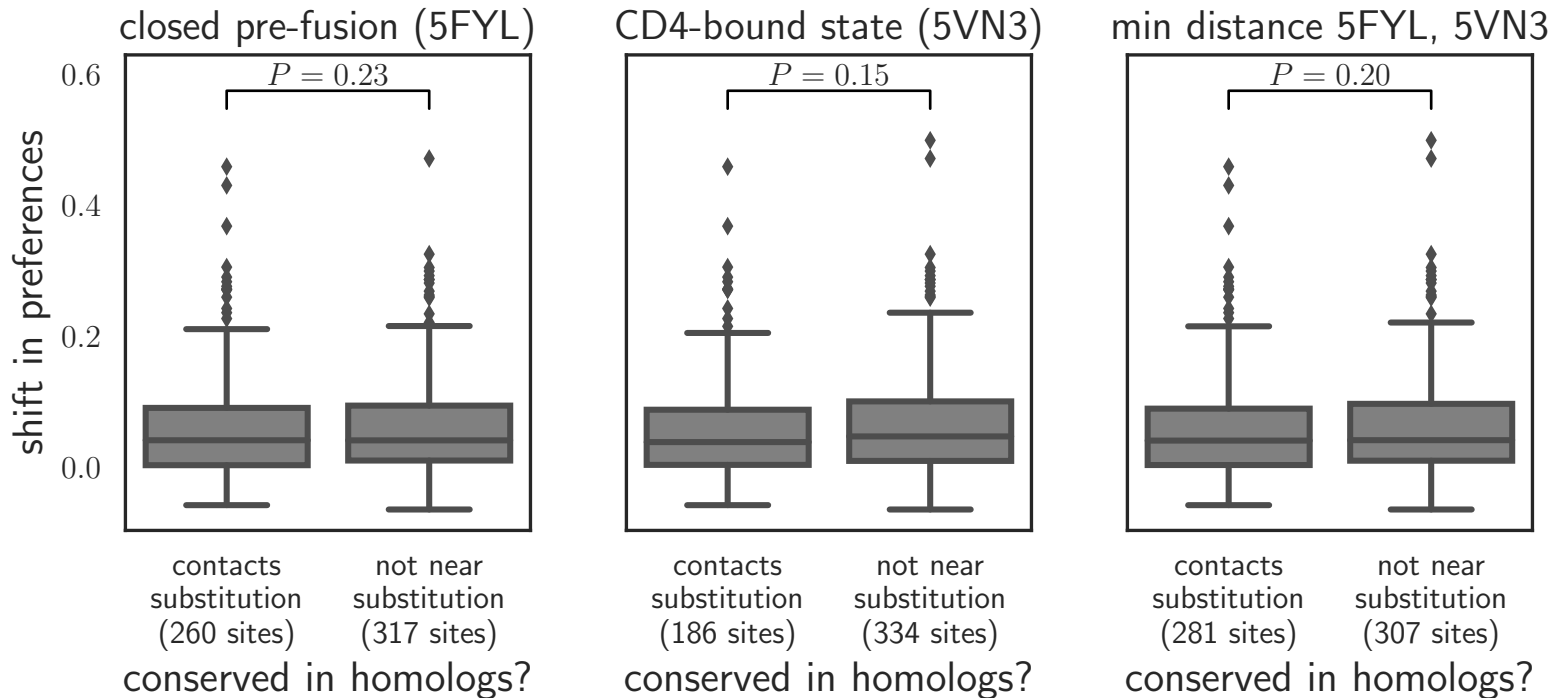

Supplement: supp [file conservation_vs_shifts_2.pdf › analysis_code/results/prefsdist/conservation_vs_shifts_2.pdf]

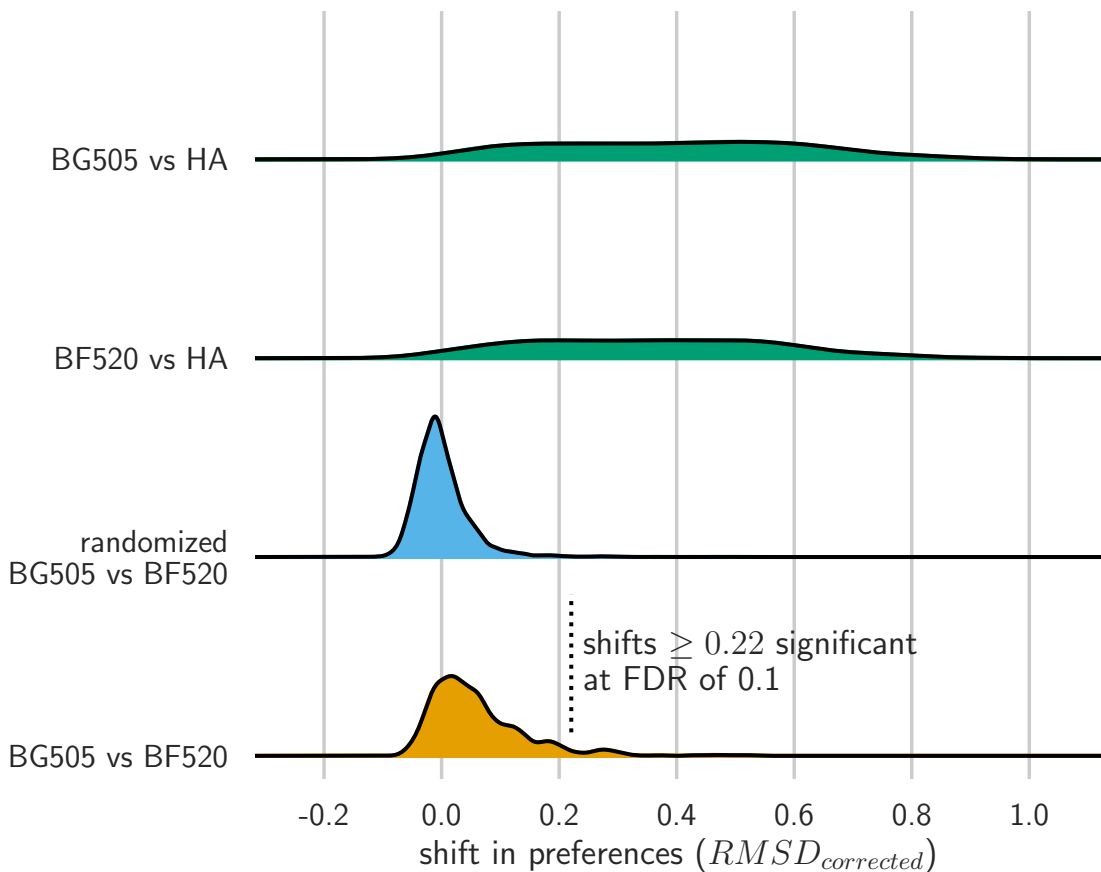

Supplement: supp [file distance_distribution.pdf › analysis_code/results/prefsdist/distance_distribution.pdf]

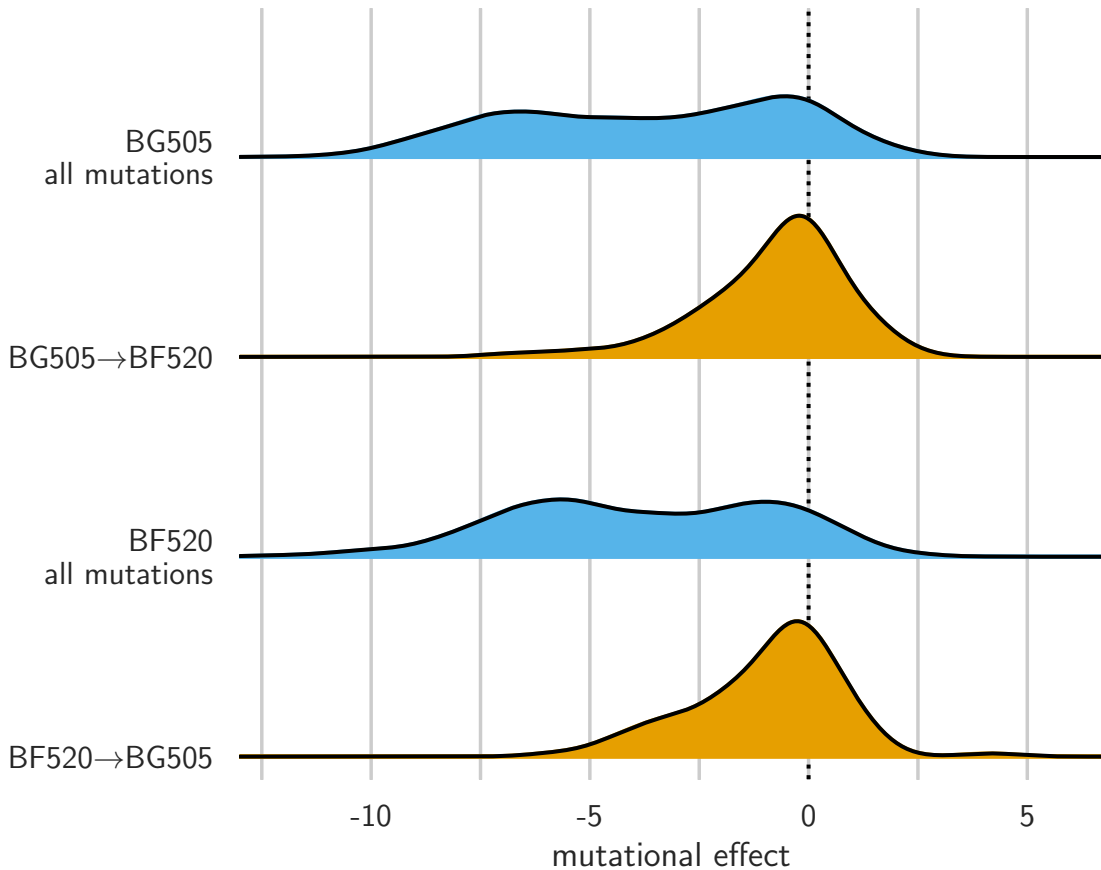

Supplement: supp [file entrenchment.pdf › analysis_code/results/prefsdist/entrenchment.pdf]

BG505  
site 598

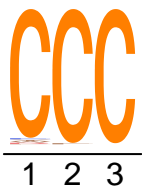

BF520  
site 598

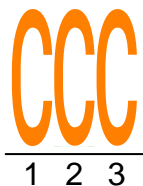

BG505  
site 528

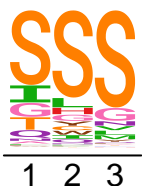

BF520  
site 528

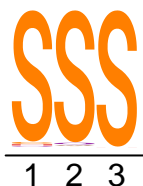

BG505  
site 288

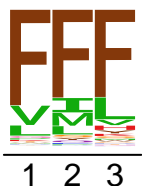

BF520  
site 288

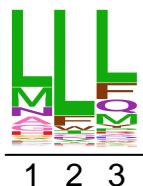

BG505  
site 512

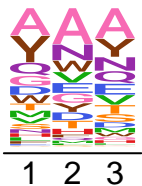

BF520  
site 512

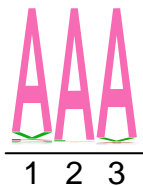

Supplement: supp [file exampleprefs.pdf › analysis_code/results/prefsdist/exampleprefs.pdf]

diff  
598

---

diff  
528

---

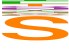

diff  
288

---

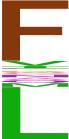

diff  
512

---

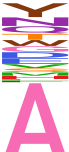

Supplement: supp [file exampleprefsdist.pdf › analysis_code/results/prefsdist/exampleprefsdist.pdf]

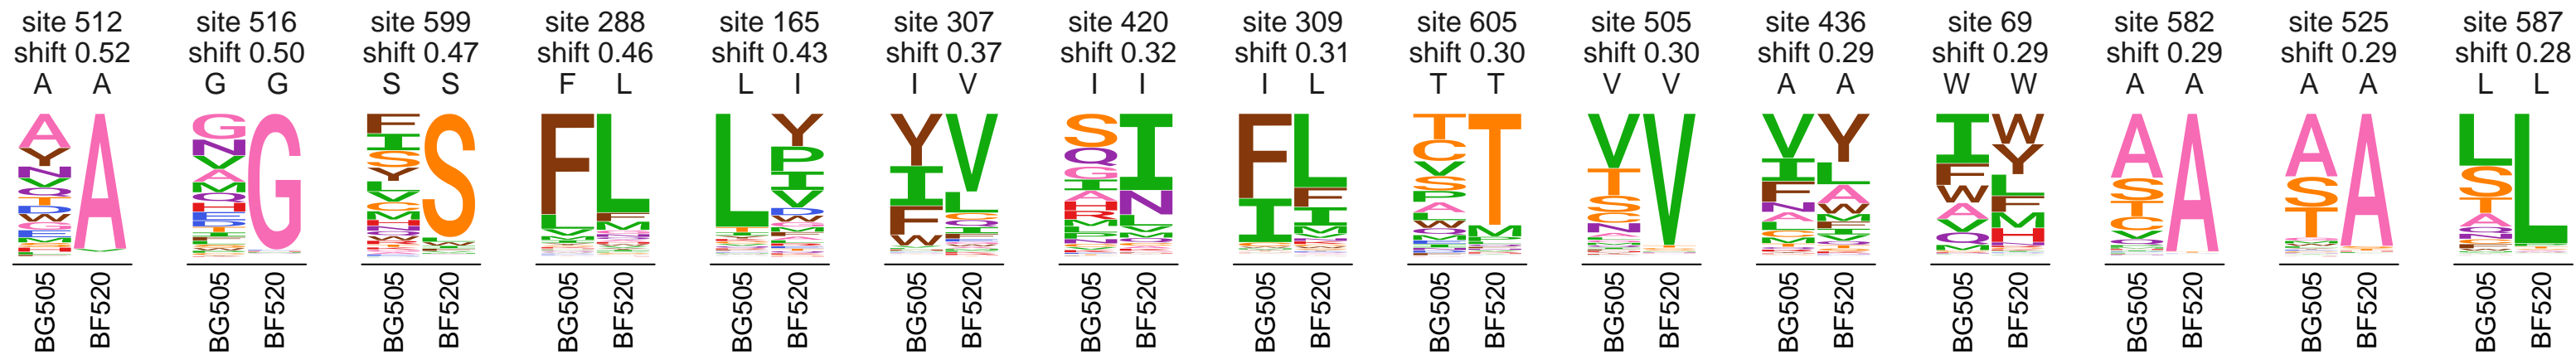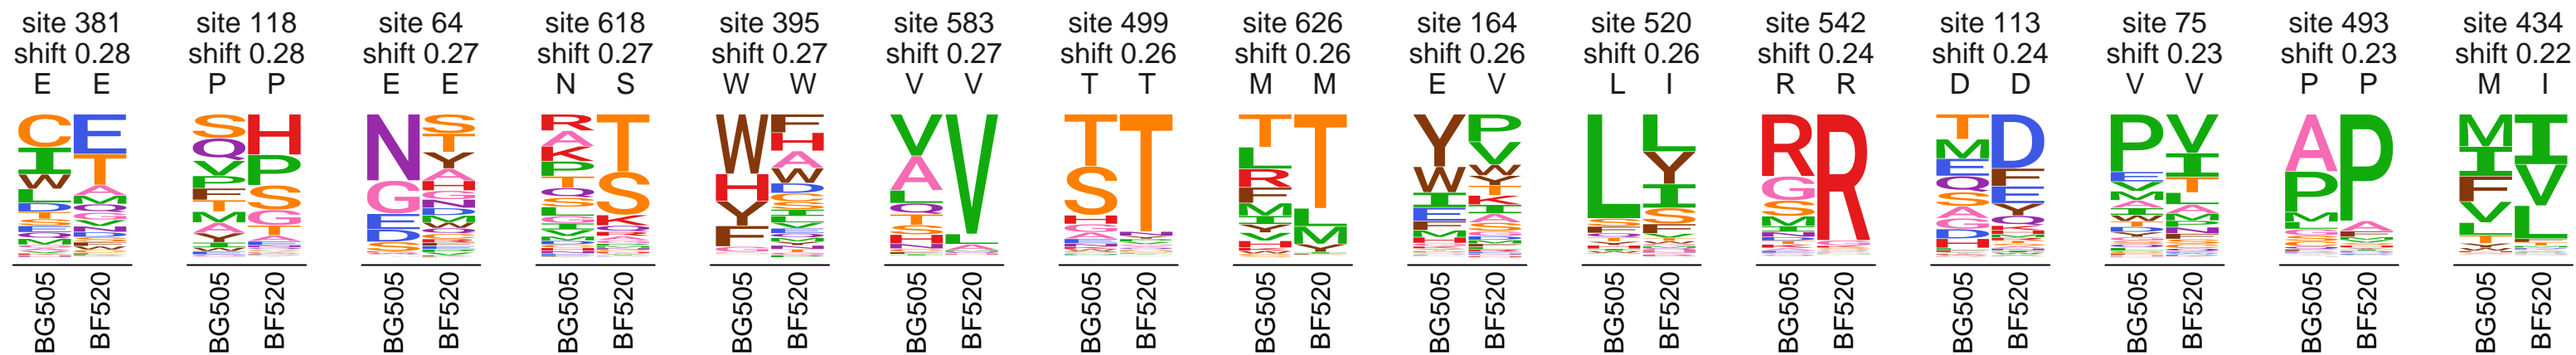

Supplement: supp [file shifted_sites.pdf › analysis_code/results/prefsdist/shifted_sites.pdf]

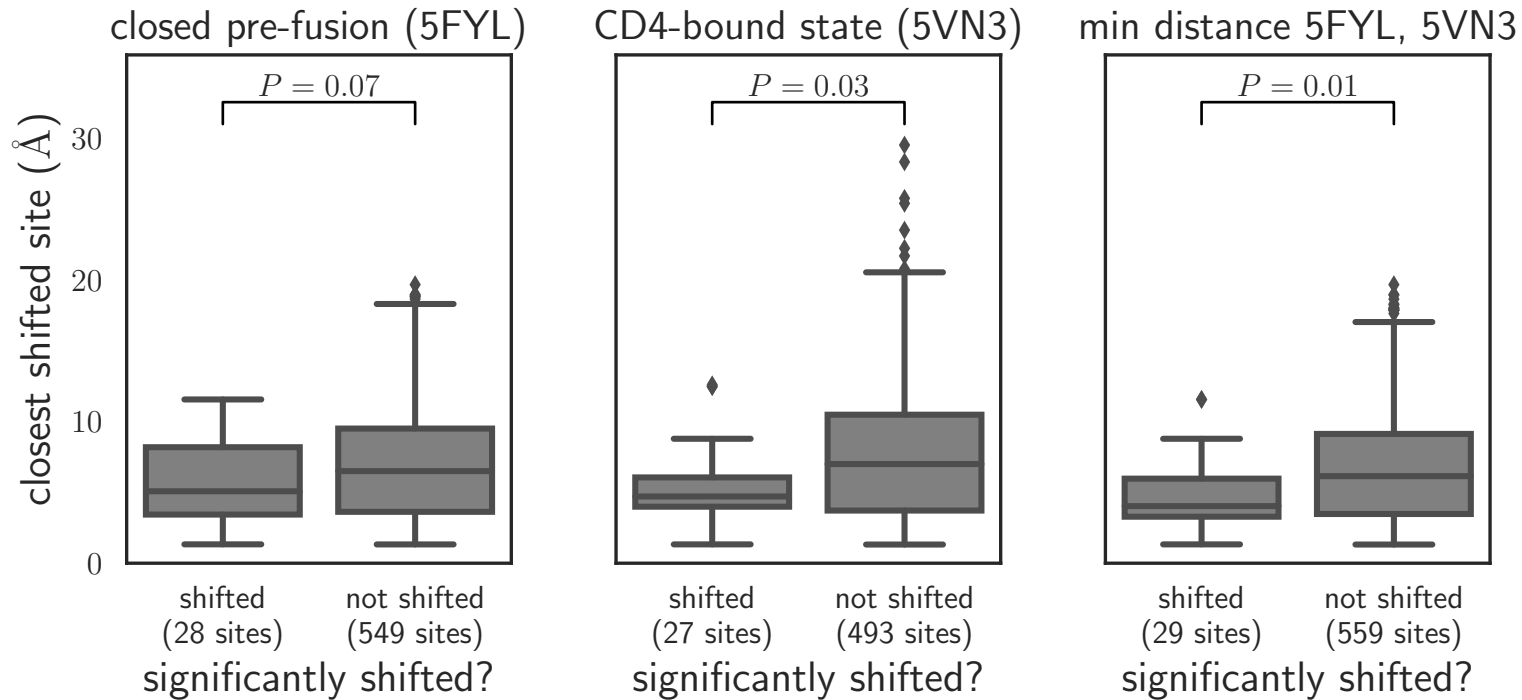

Supplement: supp [file shifts_proximity.pdf › analysis_code/results/prefsdist/shifts_proximity.pdf]

# clade A protein identity at alignable sites

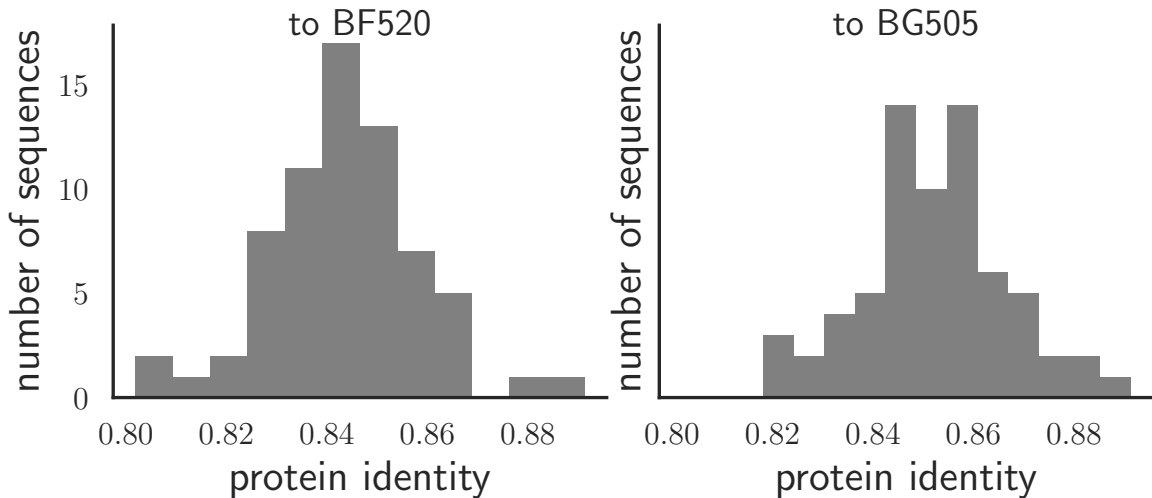

Supplement: supp [file elife_poa_e34420_Figure_1_figure_supplement_1.pdf › elife_poa_e34420_Figure_1_figure_supplement_1.pdf]

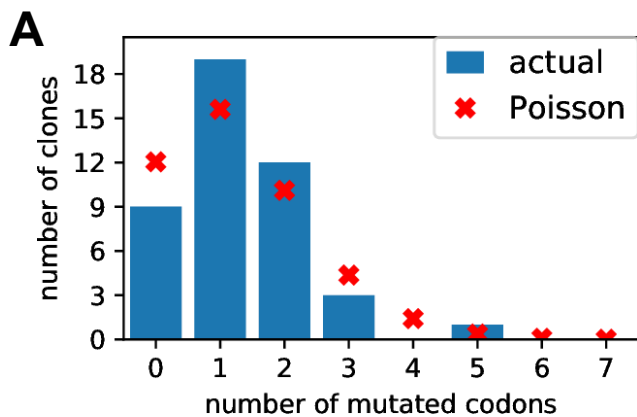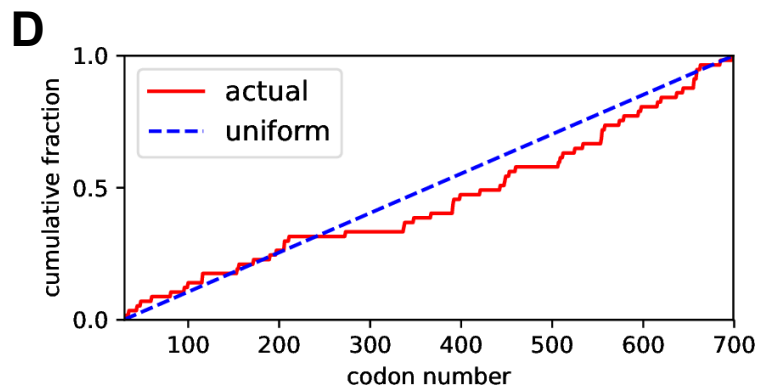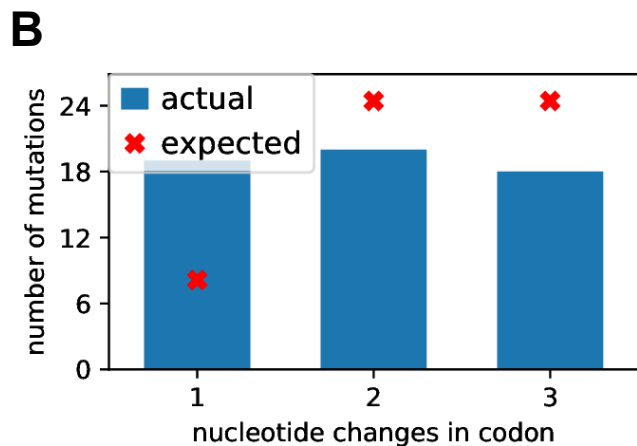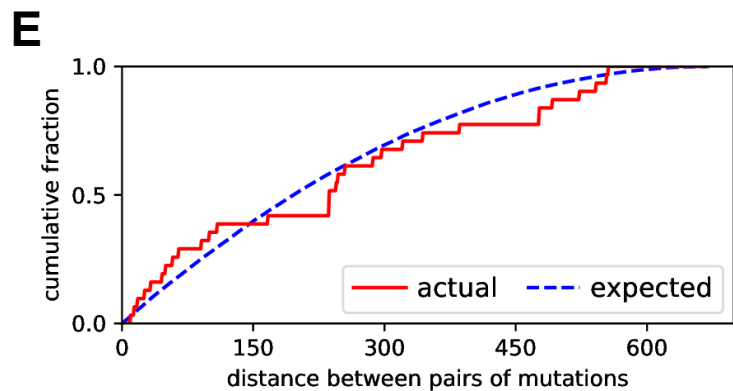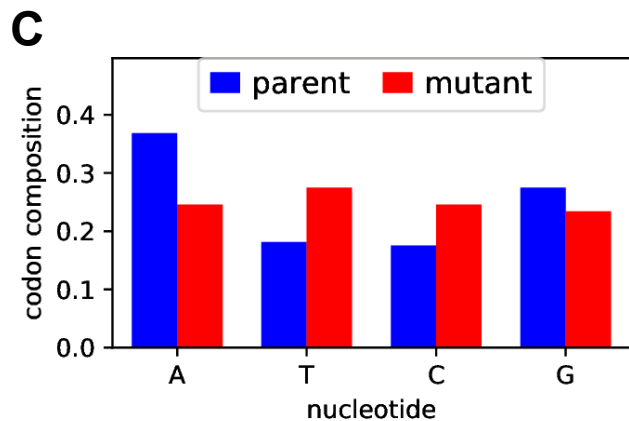

Supplement: supp [file elife_poa_e34420_Figure_2_figure_supplement_1.pdf › elife_poa_e34420_Figure_2_figure_supplement_1.pdf]



Supplement: supp [file elife_poa_e34420_Figure_3_figure_supplement_1.pdf › elife_poa_e34420_Figure_3_figure_supplement_1.pdf]

Post-fusion six-helix bundle

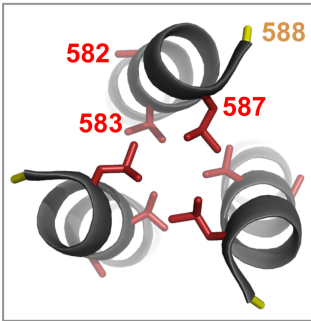

Closed pre-fusion conformation

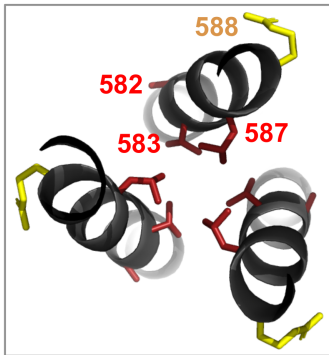

Open CD4-bound conformation

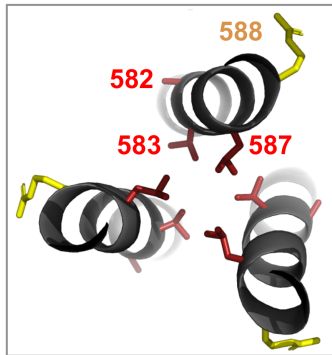

Supplement: supp [file elife_poa_e34420_Figure_7_figure_supplement_1.pdf › elife_poa_e34420_Figure_7_figure_supplement_1.pdf]

closed pre-fusion (5FYL)

CD4-bound state (5VN3)

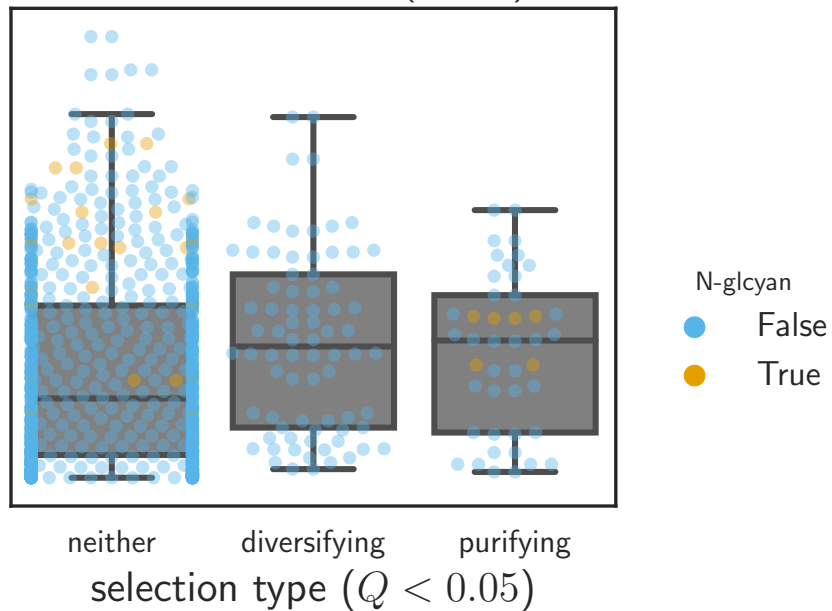

Supplement: supp [file elife_poa_e34420_Figure_9_figure_supplement_1.pdf › elife_poa_e34420_Figure_9_figure_supplement_1.pdf]



Supplement: supp [file elife_poa_e34420_Figure_9_figure_supplement_2.pdf › elife_poa_e34420_Figure_9_figure_supplement_2.pdf]

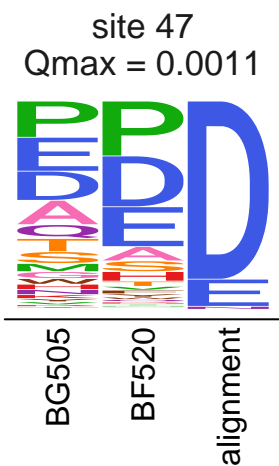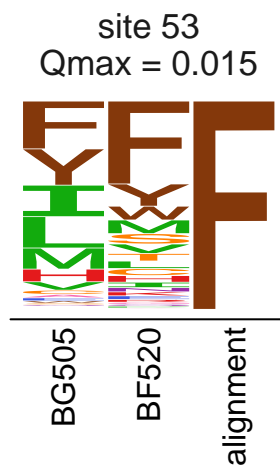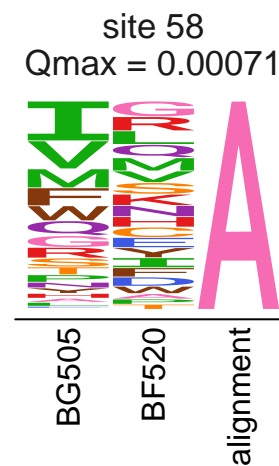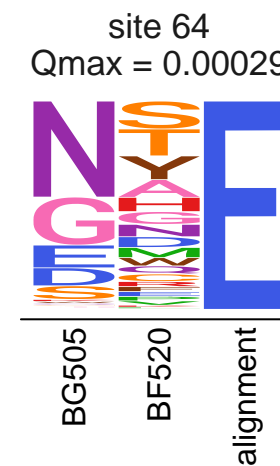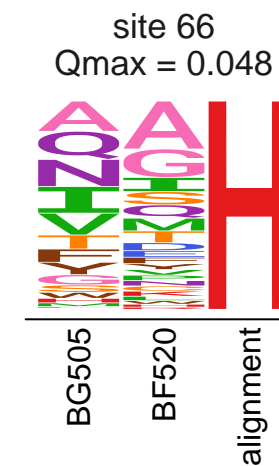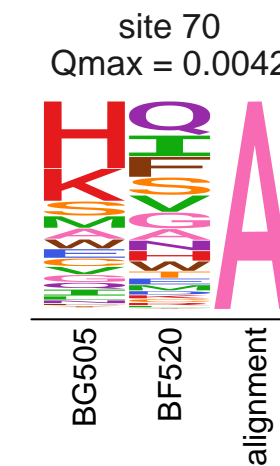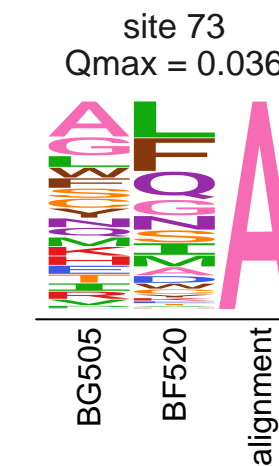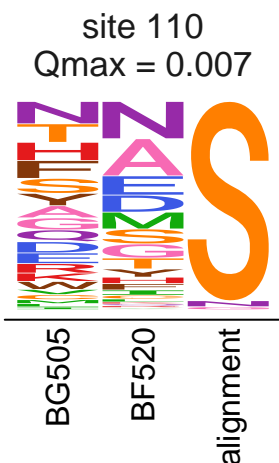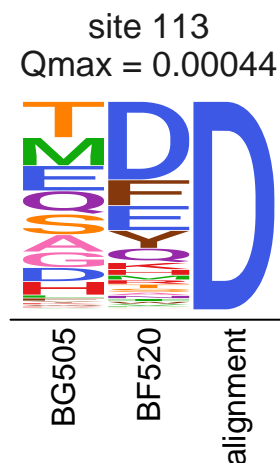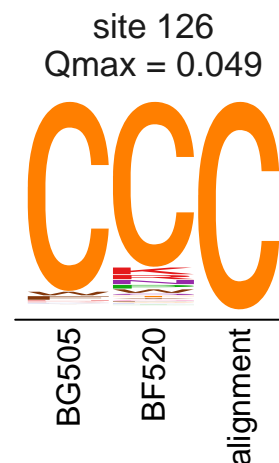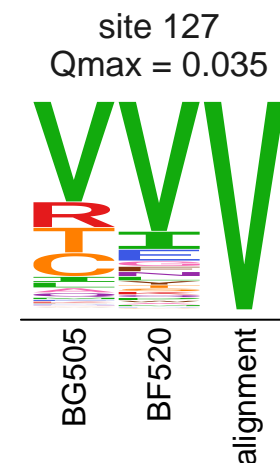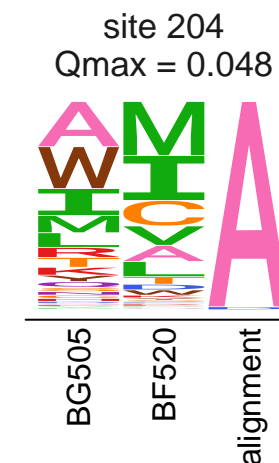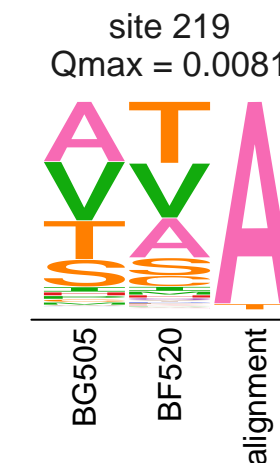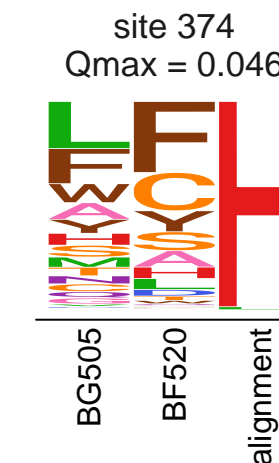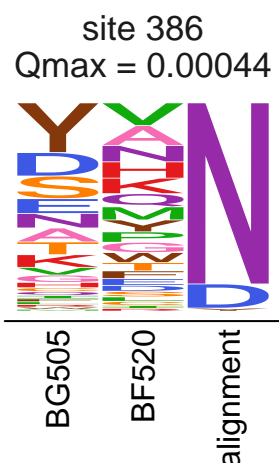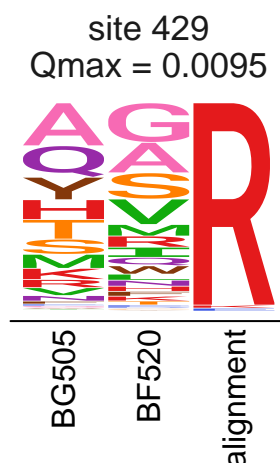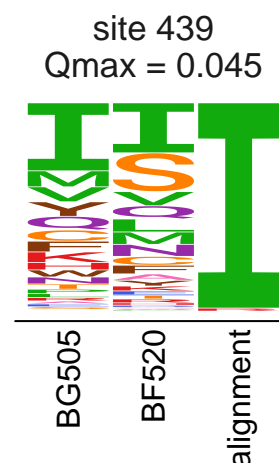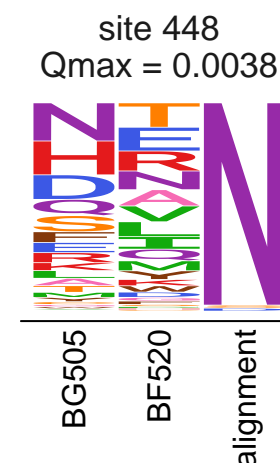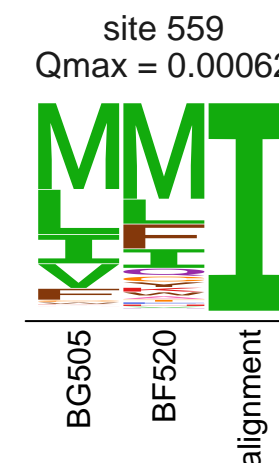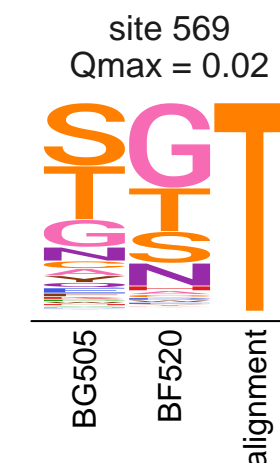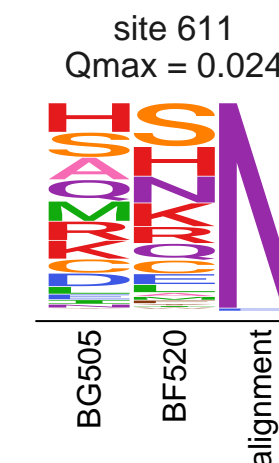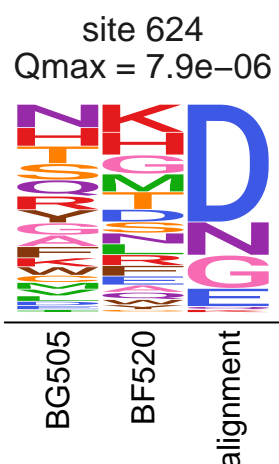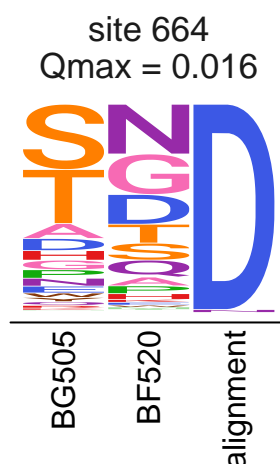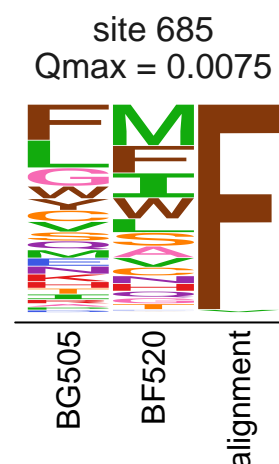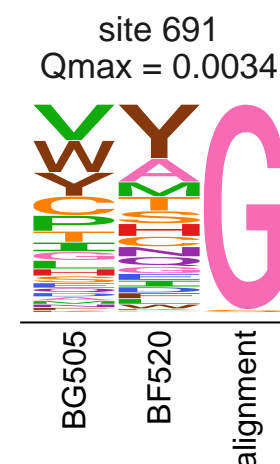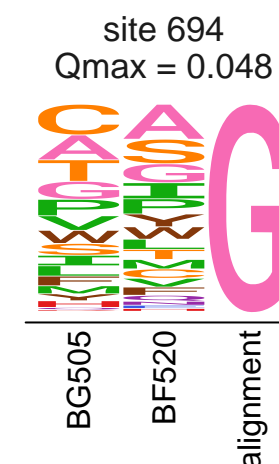

Supplement: supp [file elife_poa_e34420_Figure_9_figure_supplement_3.pdf › elife_poa_e34420_Figure_9_figure_supplement_3.pdf]
